# Supplementary material for: Community patient follow-up as a part of P. vivax case management in Cambodia: a mixed methods study
Source: Research Square preprint supplement (doi:10.21203/rs.3.rs-6423610/v1), 2025-05-09
Supplement: Supplementary file 1 [file 90a83ee0b749ab6c54eafcdb.pdf]

Supplementary Material for

***Exploring community patient follow-up as a part of *P. vivax* case management in Cambodia: a mixed methods study***

[Appendix 1](#): GRAMMS Checklist for mixed methods studies

[Appendix 2](#): VMW job aid for the implementation of VMW follow-up

[Appendix 3](#): *P. vivax* Patient treatment follow-up card

[Appendix 4](#): Example discussion guide

[Appendix 5](#): COREQ checklist for qualitative research

[Appendix 6](#): Demographic characteristics of interviews and focus group discussion participants.

## **Appendix 1: GRAMMS Checklist for mixed methods studies**

### **Good Reporting of a Mixed Methods Study (GRAMMS) Checklist**

| <b>Guideline</b>                                                                               | <b>Page Information</b> |
|------------------------------------------------------------------------------------------------|-------------------------|
| 1. Describe the justification for using a mixed methods approach to the research question      | Page 6, 7               |
| 2. Describe the design in terms of the purpose, priority and sequence of methods               | Pages 5, 6, and 9       |
| 3. Describe each method in terms of sampling, data collection and analysis                     | Pages 12-15             |
| 4. Describe where integration has occurred, how it has occurred and who has participated in it | Pages 5 and 6, 9        |
| 5. Describe any limitation of one method associated with the present of the other method       | Not applicable          |
| 6. Describe any insights gained from mixing or integrating methods                             | Pages 17,19, 21, and 23 |

Reference: O’cathain A, Murphy E, Nicholl J. The Quality of Mixed Methods Studies in Health Services Research. J Health Serv Res Policy. 2008 Apr;13(2):92–8.

## Appendix 2: VMW job aid for the implementation of VMW follow-up from Cambodia's 2022 National Malaria Treatment Guidelines <sup>1</sup>

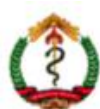

### Job Aid – VMW's Checklist for adherence and side effect monitoring for P. Vivax Radical Cure

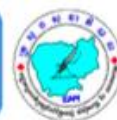

- 1 **When arriving at patient house,**
  - a) Check the patient adherence follow-up form (7-day PQ for G6PD normal and 8-week PQ for G6PD intermediate and deficient) and verify the amount of remaining medication
  - b) Ask patients if there was any history of side effects after taking the medicine.
  - c) If the patient has not completed the medication yet, ask the patients what are the reasons
- 2 Ask the patient about any history of side effects or signs and symptoms of acute hemolytic anemia (AHA), since the day of taking the medicine, or since the previous visit by VMW on day 3 and day 7 (7-day PQ), or the previous week (8-week PQ).

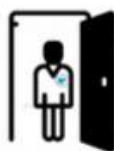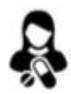
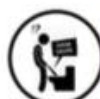

#### Urine with blood

\*Examine patient's urine in a bottle, and compare with the urine color chart

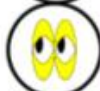

#### Pallor (pale skin or yellow eyes, nails or lips)

\*Examine patient skin, eyelids, nails and lips

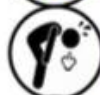

#### Shortness of breath

\*Ask and observe the patients

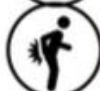

#### Back pain

\*Ask and observe the patients

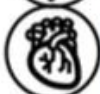

#### Increased heart rate

\*Ask and observe the patients

### 3 VMWs must report the data to MIS via phone

If VMW finds any dangerous sign among above 5 symptoms with the patient, please:

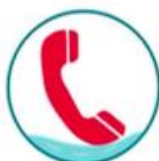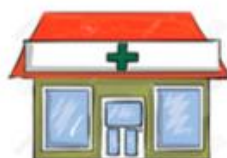

1 – Call the HC staff to consult if the patient needs to be referred, or, refer the patients to HCs (without consult)

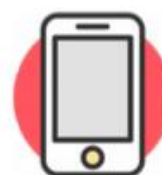

2 – Record the actions taken in MIS app

Version: March 2023

**Appendix 3: *P. vivax* Patient treatment follow-up card from Cambodia's 2022 National Malaria Treatment Guidelines <sup>1</sup>**

| <b>Patient Treatment and Information Form<br/>for Patient to Track their Treatment Course</b>                                                                                                                                                                                                                                                                                                                                                                                                                                                                                                                                                                                                                                                                                                                                                                                                                                                                                                                                                                                                                                                                                                                                                                                                                                                                                                                                                                                                                                                                                                                                                                                                                                                                                                                                                                                                                                                                                                                                                                                                                                                                                                                                                                                                                                                                                                                                                                                                                                                                                                                                                                                                                                                                                                                                                                                                                                                                                                                                                                                                                                                                                                                                                                                                                                                                                                                                                                                                                                                                                                                                                                                                                                                                                                                                                                                                                                                                                                                                                                                                                                                                                                                                                                                                                                                                                   |                                                                                      |                                                                          |                                                                       |                                                                                                                                                                                                                                                                                                                                                                                                                                                                                                                                                                                                                                                                                                                                                                                                                                                                                                                                                                                                                                                      |                                                           |                                                                          |                                                             |                                                      |                                                                          |                                                                      |                                                                                                                                                          |                                                   |                                                                                                                                                                                                                                                                                                                                                                                                                                                                                                                                                                                                                                                                                                                                                                                                                                                                                                                                                                                                                                                                                                                                                                                                                                                                                                                                                                                                                                                                                                                                                                                                                                                                                                                                                                                                                                                                                                                                                                                                                                                                                                                                                                                                                                                                                                                                                                                                                                                                                                                                                                                                                                                 |                                                                  |                                                                       |                                                                                                                                                                                                                                                                                                                                                                                                                                                                                                                                                                                                                                                                                                                                                                                                                                                                                                                                                                                                                                                                |                                                                                                                                                                                                                                                                                                                                                                                                                                                                                                                                                                                                                                                                                                                                                                                                                                                                                                                                                                                                                                                                                                                                                                                                                                                                                                                                                                                                                                                                                                                                                                                                                                                                                                                                                                                                                                                                                                                                                                                                                                                                                                                                                                                                                                                                                                                                                                                                                                                                                                                                                                                                                                                 |                        |                                                |                                                                                                                                                                                                                                                                                                                                                                                                                                                                                                                                                                                                                                                                                                                                                                                                                                                                                                                                                                                                                                                                |                                                |                                                 |                                                |                                                 |                                                |                                                 |                                                |                                                 |                                                |                                                 |                                                |                                                 |                                                                                                                                                                                                                                                                                                                                                                                                                                                                                                                                                                                                                                                                                                                                                                                                                                                                                                                                                                                                                                                                                                                                                                                              |                                                 |                                                |                                                 |                                                                                                                                                                                                                                                                                                                                                                                                                                                                                                                                                                                                                                                                                                                                                                                                                                                                                                                                                                                                                                                                                                                                                                                              |                                                 |                                              |                                                 |                                              |                                                 |                                              |                                                 |                                              |                                                 |                                              |                                                 |                                              |                                                 |                                              |                                                 |                                              |                                                 |                                              |                                                                                                                         |  |
|---------------------------------------------------------------------------------------------------------------------------------------------------------------------------------------------------------------------------------------------------------------------------------------------------------------------------------------------------------------------------------------------------------------------------------------------------------------------------------------------------------------------------------------------------------------------------------------------------------------------------------------------------------------------------------------------------------------------------------------------------------------------------------------------------------------------------------------------------------------------------------------------------------------------------------------------------------------------------------------------------------------------------------------------------------------------------------------------------------------------------------------------------------------------------------------------------------------------------------------------------------------------------------------------------------------------------------------------------------------------------------------------------------------------------------------------------------------------------------------------------------------------------------------------------------------------------------------------------------------------------------------------------------------------------------------------------------------------------------------------------------------------------------------------------------------------------------------------------------------------------------------------------------------------------------------------------------------------------------------------------------------------------------------------------------------------------------------------------------------------------------------------------------------------------------------------------------------------------------------------------------------------------------------------------------------------------------------------------------------------------------------------------------------------------------------------------------------------------------------------------------------------------------------------------------------------------------------------------------------------------------------------------------------------------------------------------------------------------------------------------------------------------------------------------------------------------------------------------------------------------------------------------------------------------------------------------------------------------------------------------------------------------------------------------------------------------------------------------------------------------------------------------------------------------------------------------------------------------------------------------------------------------------------------------------------------------------------------------------------------------------------------------------------------------------------------------------------------------------------------------------------------------------------------------------------------------------------------------------------------------------------------------------------------------------------------------------------------------------------------------------------------------------------------------------------------------------------------------------------------------------------------------------------------------------------------------------------------------------------------------------------------------------------------------------------------------------------------------------------------------------------------------------------------------------------------------------------------------------------------------------------------------------------------------------------------------------------------------------------------------------|--------------------------------------------------------------------------------------|--------------------------------------------------------------------------|-----------------------------------------------------------------------|------------------------------------------------------------------------------------------------------------------------------------------------------------------------------------------------------------------------------------------------------------------------------------------------------------------------------------------------------------------------------------------------------------------------------------------------------------------------------------------------------------------------------------------------------------------------------------------------------------------------------------------------------------------------------------------------------------------------------------------------------------------------------------------------------------------------------------------------------------------------------------------------------------------------------------------------------------------------------------------------------------------------------------------------------|-----------------------------------------------------------|--------------------------------------------------------------------------|-------------------------------------------------------------|------------------------------------------------------|--------------------------------------------------------------------------|----------------------------------------------------------------------|----------------------------------------------------------------------------------------------------------------------------------------------------------|---------------------------------------------------|-------------------------------------------------------------------------------------------------------------------------------------------------------------------------------------------------------------------------------------------------------------------------------------------------------------------------------------------------------------------------------------------------------------------------------------------------------------------------------------------------------------------------------------------------------------------------------------------------------------------------------------------------------------------------------------------------------------------------------------------------------------------------------------------------------------------------------------------------------------------------------------------------------------------------------------------------------------------------------------------------------------------------------------------------------------------------------------------------------------------------------------------------------------------------------------------------------------------------------------------------------------------------------------------------------------------------------------------------------------------------------------------------------------------------------------------------------------------------------------------------------------------------------------------------------------------------------------------------------------------------------------------------------------------------------------------------------------------------------------------------------------------------------------------------------------------------------------------------------------------------------------------------------------------------------------------------------------------------------------------------------------------------------------------------------------------------------------------------------------------------------------------------------------------------------------------------------------------------------------------------------------------------------------------------------------------------------------------------------------------------------------------------------------------------------------------------------------------------------------------------------------------------------------------------------------------------------------------------------------------------------------------------|------------------------------------------------------------------|-----------------------------------------------------------------------|----------------------------------------------------------------------------------------------------------------------------------------------------------------------------------------------------------------------------------------------------------------------------------------------------------------------------------------------------------------------------------------------------------------------------------------------------------------------------------------------------------------------------------------------------------------------------------------------------------------------------------------------------------------------------------------------------------------------------------------------------------------------------------------------------------------------------------------------------------------------------------------------------------------------------------------------------------------------------------------------------------------------------------------------------------------|-------------------------------------------------------------------------------------------------------------------------------------------------------------------------------------------------------------------------------------------------------------------------------------------------------------------------------------------------------------------------------------------------------------------------------------------------------------------------------------------------------------------------------------------------------------------------------------------------------------------------------------------------------------------------------------------------------------------------------------------------------------------------------------------------------------------------------------------------------------------------------------------------------------------------------------------------------------------------------------------------------------------------------------------------------------------------------------------------------------------------------------------------------------------------------------------------------------------------------------------------------------------------------------------------------------------------------------------------------------------------------------------------------------------------------------------------------------------------------------------------------------------------------------------------------------------------------------------------------------------------------------------------------------------------------------------------------------------------------------------------------------------------------------------------------------------------------------------------------------------------------------------------------------------------------------------------------------------------------------------------------------------------------------------------------------------------------------------------------------------------------------------------------------------------------------------------------------------------------------------------------------------------------------------------------------------------------------------------------------------------------------------------------------------------------------------------------------------------------------------------------------------------------------------------------------------------------------------------------------------------------------------------|------------------------|------------------------------------------------|----------------------------------------------------------------------------------------------------------------------------------------------------------------------------------------------------------------------------------------------------------------------------------------------------------------------------------------------------------------------------------------------------------------------------------------------------------------------------------------------------------------------------------------------------------------------------------------------------------------------------------------------------------------------------------------------------------------------------------------------------------------------------------------------------------------------------------------------------------------------------------------------------------------------------------------------------------------------------------------------------------------------------------------------------------------|------------------------------------------------|-------------------------------------------------|------------------------------------------------|-------------------------------------------------|------------------------------------------------|-------------------------------------------------|------------------------------------------------|-------------------------------------------------|------------------------------------------------|-------------------------------------------------|------------------------------------------------|-------------------------------------------------|----------------------------------------------------------------------------------------------------------------------------------------------------------------------------------------------------------------------------------------------------------------------------------------------------------------------------------------------------------------------------------------------------------------------------------------------------------------------------------------------------------------------------------------------------------------------------------------------------------------------------------------------------------------------------------------------------------------------------------------------------------------------------------------------------------------------------------------------------------------------------------------------------------------------------------------------------------------------------------------------------------------------------------------------------------------------------------------------------------------------------------------------------------------------------------------------|-------------------------------------------------|------------------------------------------------|-------------------------------------------------|----------------------------------------------------------------------------------------------------------------------------------------------------------------------------------------------------------------------------------------------------------------------------------------------------------------------------------------------------------------------------------------------------------------------------------------------------------------------------------------------------------------------------------------------------------------------------------------------------------------------------------------------------------------------------------------------------------------------------------------------------------------------------------------------------------------------------------------------------------------------------------------------------------------------------------------------------------------------------------------------------------------------------------------------------------------------------------------------------------------------------------------------------------------------------------------------|-------------------------------------------------|----------------------------------------------|-------------------------------------------------|----------------------------------------------|-------------------------------------------------|----------------------------------------------|-------------------------------------------------|----------------------------------------------|-------------------------------------------------|----------------------------------------------|-------------------------------------------------|----------------------------------------------|-------------------------------------------------|----------------------------------------------|-------------------------------------------------|----------------------------------------------|-------------------------------------------------|----------------------------------------------|-------------------------------------------------------------------------------------------------------------------------|--|
| <b>For <i>P. falciparum</i>, <i>P. knowlesi</i> and <i>P. malariae</i> malaria patients</b>                                                                                                                                                                                                                                                                                                                                                                                                                                                                                                                                                                                                                                                                                                                                                                                                                                                                                                                                                                                                                                                                                                                                                                                                                                                                                                                                                                                                                                                                                                                                                                                                                                                                                                                                                                                                                                                                                                                                                                                                                                                                                                                                                                                                                                                                                                                                                                                                                                                                                                                                                                                                                                                                                                                                                                                                                                                                                                                                                                                                                                                                                                                                                                                                                                                                                                                                                                                                                                                                                                                                                                                                                                                                                                                                                                                                                                                                                                                                                                                                                                                                                                                                                                                                                                                                                     |                                                                                      |                                                                          |                                                                       |                                                                                                                                                                                                                                                                                                                                                                                                                                                                                                                                                                                                                                                                                                                                                                                                                                                                                                                                                                                                                                                      |                                                           |                                                                          |                                                             |                                                      |                                                                          |                                                                      |                                                                                                                                                          |                                                   |                                                                                                                                                                                                                                                                                                                                                                                                                                                                                                                                                                                                                                                                                                                                                                                                                                                                                                                                                                                                                                                                                                                                                                                                                                                                                                                                                                                                                                                                                                                                                                                                                                                                                                                                                                                                                                                                                                                                                                                                                                                                                                                                                                                                                                                                                                                                                                                                                                                                                                                                                                                                                                                 |                                                                  |                                                                       |                                                                                                                                                                                                                                                                                                                                                                                                                                                                                                                                                                                                                                                                                                                                                                                                                                                                                                                                                                                                                                                                |                                                                                                                                                                                                                                                                                                                                                                                                                                                                                                                                                                                                                                                                                                                                                                                                                                                                                                                                                                                                                                                                                                                                                                                                                                                                                                                                                                                                                                                                                                                                                                                                                                                                                                                                                                                                                                                                                                                                                                                                                                                                                                                                                                                                                                                                                                                                                                                                                                                                                                                                                                                                                                                 |                        |                                                |                                                                                                                                                                                                                                                                                                                                                                                                                                                                                                                                                                                                                                                                                                                                                                                                                                                                                                                                                                                                                                                                |                                                |                                                 |                                                |                                                 |                                                |                                                 |                                                |                                                 |                                                |                                                 |                                                |                                                 |                                                                                                                                                                                                                                                                                                                                                                                                                                                                                                                                                                                                                                                                                                                                                                                                                                                                                                                                                                                                                                                                                                                                                                                              |                                                 |                                                |                                                 |                                                                                                                                                                                                                                                                                                                                                                                                                                                                                                                                                                                                                                                                                                                                                                                                                                                                                                                                                                                                                                                                                                                                                                                              |                                                 |                                              |                                                 |                                              |                                                 |                                              |                                                 |                                              |                                                 |                                              |                                                 |                                              |                                                 |                                              |                                                 |                                              |                                                 |                                              |                                                                                                                         |  |
| <ol style="list-style-type: none"> <li>Complete the <b>3-day full treatment dose</b> based on the instruction provided by your health provider.</li> <li>A treatment provider or village malaria worker (VMW) will support you to complete your medication. He/she will <b>visit your house to follow up</b> on your medication <b>on Day 3</b> after you get the treatment.</li> </ol>                                                                                                                                                                                                                                                                                                                                                                                                                                                                                                                                                                                                                                                                                                                                                                                                                                                                                                                                                                                                                                                                                                                                                                                                                                                                                                                                                                                                                                                                                                                                                                                                                                                                                                                                                                                                                                                                                                                                                                                                                                                                                                                                                                                                                                                                                                                                                                                                                                                                                                                                                                                                                                                                                                                                                                                                                                                                                                                                                                                                                                                                                                                                                                                                                                                                                                                                                                                                                                                                                                                                                                                                                                                                                                                                                                                                                                                                                                                                                                                         |                                                                                      |                                                                          |                                                                       |                                                                                                                                                                                                                                                                                                                                                                                                                                                                                                                                                                                                                                                                                                                                                                                                                                                                                                                                                                                                                                                      |                                                           |                                                                          |                                                             |                                                      |                                                                          |                                                                      |                                                                                                                                                          |                                                   |                                                                                                                                                                                                                                                                                                                                                                                                                                                                                                                                                                                                                                                                                                                                                                                                                                                                                                                                                                                                                                                                                                                                                                                                                                                                                                                                                                                                                                                                                                                                                                                                                                                                                                                                                                                                                                                                                                                                                                                                                                                                                                                                                                                                                                                                                                                                                                                                                                                                                                                                                                                                                                                 |                                                                  |                                                                       |                                                                                                                                                                                                                                                                                                                                                                                                                                                                                                                                                                                                                                                                                                                                                                                                                                                                                                                                                                                                                                                                |                                                                                                                                                                                                                                                                                                                                                                                                                                                                                                                                                                                                                                                                                                                                                                                                                                                                                                                                                                                                                                                                                                                                                                                                                                                                                                                                                                                                                                                                                                                                                                                                                                                                                                                                                                                                                                                                                                                                                                                                                                                                                                                                                                                                                                                                                                                                                                                                                                                                                                                                                                                                                                                 |                        |                                                |                                                                                                                                                                                                                                                                                                                                                                                                                                                                                                                                                                                                                                                                                                                                                                                                                                                                                                                                                                                                                                                                |                                                |                                                 |                                                |                                                 |                                                |                                                 |                                                |                                                 |                                                |                                                 |                                                |                                                 |                                                                                                                                                                                                                                                                                                                                                                                                                                                                                                                                                                                                                                                                                                                                                                                                                                                                                                                                                                                                                                                                                                                                                                                              |                                                 |                                                |                                                 |                                                                                                                                                                                                                                                                                                                                                                                                                                                                                                                                                                                                                                                                                                                                                                                                                                                                                                                                                                                                                                                                                                                                                                                              |                                                 |                                              |                                                 |                                              |                                                 |                                              |                                                 |                                              |                                                 |                                              |                                                 |                                              |                                                 |                                              |                                                 |                                              |                                                 |                                              |                                                                                                                         |  |
| <b>For <i>P. vivax</i>, <i>P. ovale</i> and mixed malaria patients</b>                                                                                                                                                                                                                                                                                                                                                                                                                                                                                                                                                                                                                                                                                                                                                                                                                                                                                                                                                                                                                                                                                                                                                                                                                                                                                                                                                                                                                                                                                                                                                                                                                                                                                                                                                                                                                                                                                                                                                                                                                                                                                                                                                                                                                                                                                                                                                                                                                                                                                                                                                                                                                                                                                                                                                                                                                                                                                                                                                                                                                                                                                                                                                                                                                                                                                                                                                                                                                                                                                                                                                                                                                                                                                                                                                                                                                                                                                                                                                                                                                                                                                                                                                                                                                                                                                                          |                                                                                      |                                                                          |                                                                       |                                                                                                                                                                                                                                                                                                                                                                                                                                                                                                                                                                                                                                                                                                                                                                                                                                                                                                                                                                                                                                                      |                                                           |                                                                          |                                                             |                                                      |                                                                          |                                                                      |                                                                                                                                                          |                                                   |                                                                                                                                                                                                                                                                                                                                                                                                                                                                                                                                                                                                                                                                                                                                                                                                                                                                                                                                                                                                                                                                                                                                                                                                                                                                                                                                                                                                                                                                                                                                                                                                                                                                                                                                                                                                                                                                                                                                                                                                                                                                                                                                                                                                                                                                                                                                                                                                                                                                                                                                                                                                                                                 |                                                                  |                                                                       |                                                                                                                                                                                                                                                                                                                                                                                                                                                                                                                                                                                                                                                                                                                                                                                                                                                                                                                                                                                                                                                                |                                                                                                                                                                                                                                                                                                                                                                                                                                                                                                                                                                                                                                                                                                                                                                                                                                                                                                                                                                                                                                                                                                                                                                                                                                                                                                                                                                                                                                                                                                                                                                                                                                                                                                                                                                                                                                                                                                                                                                                                                                                                                                                                                                                                                                                                                                                                                                                                                                                                                                                                                                                                                                                 |                        |                                                |                                                                                                                                                                                                                                                                                                                                                                                                                                                                                                                                                                                                                                                                                                                                                                                                                                                                                                                                                                                                                                                                |                                                |                                                 |                                                |                                                 |                                                |                                                 |                                                |                                                 |                                                |                                                 |                                                |                                                 |                                                                                                                                                                                                                                                                                                                                                                                                                                                                                                                                                                                                                                                                                                                                                                                                                                                                                                                                                                                                                                                                                                                                                                                              |                                                 |                                                |                                                 |                                                                                                                                                                                                                                                                                                                                                                                                                                                                                                                                                                                                                                                                                                                                                                                                                                                                                                                                                                                                                                                                                                                                                                                              |                                                 |                                              |                                                 |                                              |                                                 |                                              |                                                 |                                              |                                                 |                                              |                                                 |                                              |                                                 |                                              |                                                 |                                              |                                                 |                                              |                                                                                                                         |  |
| <ol style="list-style-type: none"> <li>In addition to the <b>3-day full treatment dose of ACT</b>, radical cure is provided for all <i>P. vivax</i>, <i>P. ovale</i> and mixed malaria patients. G6PD normal patients complete <b>7-day Primaquine</b>, and G6PD intermediate or deficient patients complete 8-week Primaquine.</li> <li>For 7-day Primaquine, a treatment provider or village malaria worker (VMW) will support you to complete your medication. He/she will <b>call or visit your house to follow up</b> on your medication <b>on Day 3 and Day 7</b> after you get the treatment.</li> <li>For 8-week Primaquine, patients are required to travel back to HC on <b>Day 3 and Day 7</b> for checking the hemoglobin level before receiving the next dose. From Week 3, the completion of the medication will be supervised by HC or VMW via phone call or visits.</li> <li>What do I do if I miss a dose? Continue taking your medication according to your schedule. Do not take 2 doses at the same time.</li> </ol>                                                                                                                                                                                                                                                                                                                                                                                                                                                                                                                                                                                                                                                                                                                                                                                                                                                                                                                                                                                                                                                                                                                                                                                                                                                                                                                                                                                                                                                                                                                                                                                                                                                                                                                                                                                                                                                                                                                                                                                                                                                                                                                                                                                                                                                                                                                                                                                                                                                                                                                                                                                                                                                                                                                                                                                                                                                                                                                                                                                                                                                                                                                                                                                                                                                                                                                                        |                                                                                      |                                                                          |                                                                       |                                                                                                                                                                                                                                                                                                                                                                                                                                                                                                                                                                                                                                                                                                                                                                                                                                                                                                                                                                                                                                                      |                                                           |                                                                          |                                                             |                                                      |                                                                          |                                                                      |                                                                                                                                                          |                                                   |                                                                                                                                                                                                                                                                                                                                                                                                                                                                                                                                                                                                                                                                                                                                                                                                                                                                                                                                                                                                                                                                                                                                                                                                                                                                                                                                                                                                                                                                                                                                                                                                                                                                                                                                                                                                                                                                                                                                                                                                                                                                                                                                                                                                                                                                                                                                                                                                                                                                                                                                                                                                                                                 |                                                                  |                                                                       |                                                                                                                                                                                                                                                                                                                                                                                                                                                                                                                                                                                                                                                                                                                                                                                                                                                                                                                                                                                                                                                                |                                                                                                                                                                                                                                                                                                                                                                                                                                                                                                                                                                                                                                                                                                                                                                                                                                                                                                                                                                                                                                                                                                                                                                                                                                                                                                                                                                                                                                                                                                                                                                                                                                                                                                                                                                                                                                                                                                                                                                                                                                                                                                                                                                                                                                                                                                                                                                                                                                                                                                                                                                                                                                                 |                        |                                                |                                                                                                                                                                                                                                                                                                                                                                                                                                                                                                                                                                                                                                                                                                                                                                                                                                                                                                                                                                                                                                                                |                                                |                                                 |                                                |                                                 |                                                |                                                 |                                                |                                                 |                                                |                                                 |                                                |                                                 |                                                                                                                                                                                                                                                                                                                                                                                                                                                                                                                                                                                                                                                                                                                                                                                                                                                                                                                                                                                                                                                                                                                                                                                              |                                                 |                                                |                                                 |                                                                                                                                                                                                                                                                                                                                                                                                                                                                                                                                                                                                                                                                                                                                                                                                                                                                                                                                                                                                                                                                                                                                                                                              |                                                 |                                              |                                                 |                                              |                                                 |                                              |                                                 |                                              |                                                 |                                              |                                                 |                                              |                                                 |                                              |                                                 |                                              |                                                 |                                              |                                                                                                                         |  |
| <b>If you take the full dose of medication, you reduce the chance of relapse and prevent transmission of malaria to your household and colleagues</b>                                                                                                                                                                                                                                                                                                                                                                                                                                                                                                                                                                                                                                                                                                                                                                                                                                                                                                                                                                                                                                                                                                                                                                                                                                                                                                                                                                                                                                                                                                                                                                                                                                                                                                                                                                                                                                                                                                                                                                                                                                                                                                                                                                                                                                                                                                                                                                                                                                                                                                                                                                                                                                                                                                                                                                                                                                                                                                                                                                                                                                                                                                                                                                                                                                                                                                                                                                                                                                                                                                                                                                                                                                                                                                                                                                                                                                                                                                                                                                                                                                                                                                                                                                                                                           |                                                                                      |                                                                          |                                                                       |                                                                                                                                                                                                                                                                                                                                                                                                                                                                                                                                                                                                                                                                                                                                                                                                                                                                                                                                                                                                                                                      |                                                           |                                                                          |                                                             |                                                      |                                                                          |                                                                      |                                                                                                                                                          |                                                   |                                                                                                                                                                                                                                                                                                                                                                                                                                                                                                                                                                                                                                                                                                                                                                                                                                                                                                                                                                                                                                                                                                                                                                                                                                                                                                                                                                                                                                                                                                                                                                                                                                                                                                                                                                                                                                                                                                                                                                                                                                                                                                                                                                                                                                                                                                                                                                                                                                                                                                                                                                                                                                                 |                                                                  |                                                                       |                                                                                                                                                                                                                                                                                                                                                                                                                                                                                                                                                                                                                                                                                                                                                                                                                                                                                                                                                                                                                                                                |                                                                                                                                                                                                                                                                                                                                                                                                                                                                                                                                                                                                                                                                                                                                                                                                                                                                                                                                                                                                                                                                                                                                                                                                                                                                                                                                                                                                                                                                                                                                                                                                                                                                                                                                                                                                                                                                                                                                                                                                                                                                                                                                                                                                                                                                                                                                                                                                                                                                                                                                                                                                                                                 |                        |                                                |                                                                                                                                                                                                                                                                                                                                                                                                                                                                                                                                                                                                                                                                                                                                                                                                                                                                                                                                                                                                                                                                |                                                |                                                 |                                                |                                                 |                                                |                                                 |                                                |                                                 |                                                |                                                 |                                                |                                                 |                                                                                                                                                                                                                                                                                                                                                                                                                                                                                                                                                                                                                                                                                                                                                                                                                                                                                                                                                                                                                                                                                                                                                                                              |                                                 |                                                |                                                 |                                                                                                                                                                                                                                                                                                                                                                                                                                                                                                                                                                                                                                                                                                                                                                                                                                                                                                                                                                                                                                                                                                                                                                                              |                                                 |                                              |                                                 |                                              |                                                 |                                              |                                                 |                                              |                                                 |                                              |                                                 |                                              |                                                 |                                              |                                                 |                                              |                                                 |                                              |                                                                                                                         |  |
| <p style="font-size: small;">If you experience any of these signs and symptoms below, stop taking primaquine and<br/> <b>(1) go to visit the original health provider (health centers or hospitals) immediately</b><br/> <b>(2) go to the nearest hospital immediately, if the health center is closed or you have traveled to other areas</b></p> <div style="display: flex; justify-content: space-around; align-items: center;"> <div style="text-align: center;"> <br/> <b>URINE WITH BLOOD</b> </div> <div style="text-align: center;"> <br/> <b>Pallor, yellow skin and eyes</b> </div> <div style="text-align: center;"> <br/> <b>Shortness of breath, rapid breathing</b> </div> <div style="text-align: center;"> <br/> <b>Back pain</b> </div> <div style="text-align: center;"> <br/> <b>Increased heart rate, palpitations, tachycardia</b> </div> </div>                                                                                                                                                                                                                                                                                                                                                                                                                                                                                                                                                                                                                                                                                                                                                                                                                                                                                                                                                                                                                                                                                                                                                                                                                                                                                                                                                                                                                                                                                                                                                                                                                                                                                                                                                                                                                                                                                                                                                                                                                                                                                                                                                                                                                                                                                                                                                                                                                                                                                                                                                                                                                                                                                                                                                                                                                                                                                                                                                                                                                                                                                                                                                                                                                                                                                                                                                                                                                                                                                                           |                                                                                      |                                                                          |                                                                       |                                                                                                                                                                                                                                                                                                                                                                                                                                                                                                                                                                                                                                                                                                                                                                                                                                                                                                                                                                                                                                                      |                                                           |                                                                          |                                                             |                                                      |                                                                          |                                                                      |                                                                                                                                                          |                                                   |                                                                                                                                                                                                                                                                                                                                                                                                                                                                                                                                                                                                                                                                                                                                                                                                                                                                                                                                                                                                                                                                                                                                                                                                                                                                                                                                                                                                                                                                                                                                                                                                                                                                                                                                                                                                                                                                                                                                                                                                                                                                                                                                                                                                                                                                                                                                                                                                                                                                                                                                                                                                                                                 |                                                                  |                                                                       |                                                                                                                                                                                                                                                                                                                                                                                                                                                                                                                                                                                                                                                                                                                                                                                                                                                                                                                                                                                                                                                                |                                                                                                                                                                                                                                                                                                                                                                                                                                                                                                                                                                                                                                                                                                                                                                                                                                                                                                                                                                                                                                                                                                                                                                                                                                                                                                                                                                                                                                                                                                                                                                                                                                                                                                                                                                                                                                                                                                                                                                                                                                                                                                                                                                                                                                                                                                                                                                                                                                                                                                                                                                                                                                                 |                        |                                                |                                                                                                                                                                                                                                                                                                                                                                                                                                                                                                                                                                                                                                                                                                                                                                                                                                                                                                                                                                                                                                                                |                                                |                                                 |                                                |                                                 |                                                |                                                 |                                                |                                                 |                                                |                                                 |                                                |                                                 |                                                                                                                                                                                                                                                                                                                                                                                                                                                                                                                                                                                                                                                                                                                                                                                                                                                                                                                                                                                                                                                                                                                                                                                              |                                                 |                                                |                                                 |                                                                                                                                                                                                                                                                                                                                                                                                                                                                                                                                                                                                                                                                                                                                                                                                                                                                                                                                                                                                                                                                                                                                                                                              |                                                 |                                              |                                                 |                                              |                                                 |                                              |                                                 |                                              |                                                 |                                              |                                                 |                                              |                                                 |                                              |                                                 |                                              |                                                 |                                              |                                                                                                                         |  |
| <b>For all patients - How can you protect yourself from malaria?</b>                                                                                                                                                                                                                                                                                                                                                                                                                                                                                                                                                                                                                                                                                                                                                                                                                                                                                                                                                                                                                                                                                                                                                                                                                                                                                                                                                                                                                                                                                                                                                                                                                                                                                                                                                                                                                                                                                                                                                                                                                                                                                                                                                                                                                                                                                                                                                                                                                                                                                                                                                                                                                                                                                                                                                                                                                                                                                                                                                                                                                                                                                                                                                                                                                                                                                                                                                                                                                                                                                                                                                                                                                                                                                                                                                                                                                                                                                                                                                                                                                                                                                                                                                                                                                                                                                                            |                                                                                      |                                                                          |                                                                       |                                                                                                                                                                                                                                                                                                                                                                                                                                                                                                                                                                                                                                                                                                                                                                                                                                                                                                                                                                                                                                                      |                                                           |                                                                          |                                                             |                                                      |                                                                          |                                                                      |                                                                                                                                                          |                                                   |                                                                                                                                                                                                                                                                                                                                                                                                                                                                                                                                                                                                                                                                                                                                                                                                                                                                                                                                                                                                                                                                                                                                                                                                                                                                                                                                                                                                                                                                                                                                                                                                                                                                                                                                                                                                                                                                                                                                                                                                                                                                                                                                                                                                                                                                                                                                                                                                                                                                                                                                                                                                                                                 |                                                                  |                                                                       |                                                                                                                                                                                                                                                                                                                                                                                                                                                                                                                                                                                                                                                                                                                                                                                                                                                                                                                                                                                                                                                                |                                                                                                                                                                                                                                                                                                                                                                                                                                                                                                                                                                                                                                                                                                                                                                                                                                                                                                                                                                                                                                                                                                                                                                                                                                                                                                                                                                                                                                                                                                                                                                                                                                                                                                                                                                                                                                                                                                                                                                                                                                                                                                                                                                                                                                                                                                                                                                                                                                                                                                                                                                                                                                                 |                        |                                                |                                                                                                                                                                                                                                                                                                                                                                                                                                                                                                                                                                                                                                                                                                                                                                                                                                                                                                                                                                                                                                                                |                                                |                                                 |                                                |                                                 |                                                |                                                 |                                                |                                                 |                                                |                                                 |                                                |                                                 |                                                                                                                                                                                                                                                                                                                                                                                                                                                                                                                                                                                                                                                                                                                                                                                                                                                                                                                                                                                                                                                                                                                                                                                              |                                                 |                                                |                                                 |                                                                                                                                                                                                                                                                                                                                                                                                                                                                                                                                                                                                                                                                                                                                                                                                                                                                                                                                                                                                                                                                                                                                                                                              |                                                 |                                              |                                                 |                                              |                                                 |                                              |                                                 |                                              |                                                 |                                              |                                                 |                                              |                                                 |                                              |                                                 |                                              |                                                 |                                              |                                                                                                                         |  |
| <br><b>1</b> Sleep under bed nets at all times                                                                                                                                                                                                                                                                                                                                                                                                                                                                                                                                                                                                                                                                                                                                                                                                                                                                                                                                                                                                                                                                                                                                                                                                                                                                                                                                                                                                                                                                                                                                                                                                                                                                                                                                                                                                                                                                                                                                                                                                                                                                                                                                                                                                                                                                                                                                                                                                                                                                                                                                                                                                                                                                                                                                                                                                                                                                                                                                                                                                                                                                                                                                                                                                                                                                                                                                                                                                                                                                                                                                                                                                                                                                                                                                                                                                                                                                                                                                                                                                                                                                                                                                                                                                                                                                                                                                  | <br><b>2</b> Wear long sleeved clothes Particularly in the evening and in the forest |                                                                          |                                                                       |                                                                                                                                                                                                                                                                                                                                                                                                                                                                                                                                                                                                                                                                                                                                                                                                                                                                                                                                                                                                                                                      |                                                           |                                                                          |                                                             |                                                      |                                                                          |                                                                      |                                                                                                                                                          |                                                   |                                                                                                                                                                                                                                                                                                                                                                                                                                                                                                                                                                                                                                                                                                                                                                                                                                                                                                                                                                                                                                                                                                                                                                                                                                                                                                                                                                                                                                                                                                                                                                                                                                                                                                                                                                                                                                                                                                                                                                                                                                                                                                                                                                                                                                                                                                                                                                                                                                                                                                                                                                                                                                                 |                                                                  |                                                                       |                                                                                                                                                                                                                                                                                                                                                                                                                                                                                                                                                                                                                                                                                                                                                                                                                                                                                                                                                                                                                                                                |                                                                                                                                                                                                                                                                                                                                                                                                                                                                                                                                                                                                                                                                                                                                                                                                                                                                                                                                                                                                                                                                                                                                                                                                                                                                                                                                                                                                                                                                                                                                                                                                                                                                                                                                                                                                                                                                                                                                                                                                                                                                                                                                                                                                                                                                                                                                                                                                                                                                                                                                                                                                                                                 |                        |                                                |                                                                                                                                                                                                                                                                                                                                                                                                                                                                                                                                                                                                                                                                                                                                                                                                                                                                                                                                                                                                                                                                |                                                |                                                 |                                                |                                                 |                                                |                                                 |                                                |                                                 |                                                |                                                 |                                                |                                                 |                                                                                                                                                                                                                                                                                                                                                                                                                                                                                                                                                                                                                                                                                                                                                                                                                                                                                                                                                                                                                                                                                                                                                                                              |                                                 |                                                |                                                 |                                                                                                                                                                                                                                                                                                                                                                                                                                                                                                                                                                                                                                                                                                                                                                                                                                                                                                                                                                                                                                                                                                                                                                                              |                                                 |                                              |                                                 |                                              |                                                 |                                              |                                                 |                                              |                                                 |                                              |                                                 |                                              |                                                 |                                              |                                                 |                                              |                                                 |                                              |                                                                                                                         |  |
| <br><b>3</b> If you or a family member has a fever, go for malaria testing at nearest health facilities or VMW/MMW                                                                                                                                                                                                                                                                                                                                                                                                                                                                                                                                                                                                                                                                                                                                                                                                                                                                                                                                                                                                                                                                                                                                                                                                                                                                                                                                                                                                                                                                                                                                                                                                                                                                                                                                                                                                                                                                                                                                                                                                                                                                                                                                                                                                                                                                                                                                                                                                                                                                                                                                                                                                                                                                                                                                                                                                                                                                                                                                                                                                                                                                                                                                                                                                                                                                                                                                                                                                                                                                                                                                                                                                                                                                                                                                                                                                                                                                                                                                                                                                                                                                                                                                                                                                                                                              |                                                                                      |                                                                          |                                                                       |                                                                                                                                                                                                                                                                                                                                                                                                                                                                                                                                                                                                                                                                                                                                                                                                                                                                                                                                                                                                                                                      |                                                           |                                                                          |                                                             |                                                      |                                                                          |                                                                      |                                                                                                                                                          |                                                   |                                                                                                                                                                                                                                                                                                                                                                                                                                                                                                                                                                                                                                                                                                                                                                                                                                                                                                                                                                                                                                                                                                                                                                                                                                                                                                                                                                                                                                                                                                                                                                                                                                                                                                                                                                                                                                                                                                                                                                                                                                                                                                                                                                                                                                                                                                                                                                                                                                                                                                                                                                                                                                                 |                                                                  |                                                                       |                                                                                                                                                                                                                                                                                                                                                                                                                                                                                                                                                                                                                                                                                                                                                                                                                                                                                                                                                                                                                                                                |                                                                                                                                                                                                                                                                                                                                                                                                                                                                                                                                                                                                                                                                                                                                                                                                                                                                                                                                                                                                                                                                                                                                                                                                                                                                                                                                                                                                                                                                                                                                                                                                                                                                                                                                                                                                                                                                                                                                                                                                                                                                                                                                                                                                                                                                                                                                                                                                                                                                                                                                                                                                                                                 |                        |                                                |                                                                                                                                                                                                                                                                                                                                                                                                                                                                                                                                                                                                                                                                                                                                                                                                                                                                                                                                                                                                                                                                |                                                |                                                 |                                                |                                                 |                                                |                                                 |                                                |                                                 |                                                |                                                 |                                                |                                                 |                                                                                                                                                                                                                                                                                                                                                                                                                                                                                                                                                                                                                                                                                                                                                                                                                                                                                                                                                                                                                                                                                                                                                                                              |                                                 |                                                |                                                 |                                                                                                                                                                                                                                                                                                                                                                                                                                                                                                                                                                                                                                                                                                                                                                                                                                                                                                                                                                                                                                                                                                                                                                                              |                                                 |                                              |                                                 |                                              |                                                 |                                              |                                                 |                                              |                                                 |                                              |                                                 |                                              |                                                 |                                              |                                                 |                                              |                                                 |                                              |                                                                                                                         |  |
| <table style="width: 100%; border: none;"> <tr> <td style="width: 20%;">Patient Name: <input style="width: 80%;" type="text"/></td> <td style="width: 10%;">Sex: M / F</td> <td style="width: 15%;">Weight (kg): <input style="width: 65%;" type="text"/></td> <td style="width: 15%;">Current Village: <input style="width: 80%;" type="text"/></td> <td style="width: 40%;">Species: <i>Pf</i> / <i>Pv</i> / mix / <i>Pk</i> / <i>Po</i> / <i>Pm</i></td> </tr> <tr> <td>Date of G6PD test: <input style="width: 15%;" type="text"/></td> <td>G6PD value: <input style="width: 15%;" type="text"/></td> <td>Hemoglobin (SD Biosensor): <input style="width: 15%;" type="text"/> g/dL</td> <td>Hemoglobin level (Hemocue): <input style="width: 15%;" type="text"/></td> <td>Day0 <input style="width: 15%;" type="text"/> g/dL Day3 <input style="width: 15%;" type="text"/> g/dL Day7 <input style="width: 15%;" type="text"/> g/dL</td> </tr> <tr> <td>HF Name: <input style="width: 20%;" type="text"/></td> <td>HF Phone No.: <input style="width: 20%;" type="text"/></td> <td>Assigned Hospital Name: <input style="width: 20%;" type="text"/></td> <td colspan="2">Assigned Hospital Phone No.: <input style="width: 40%;" type="text"/></td> </tr> </table>                                                                                                                                                                                                                                                                                                                                                                                                                                                                                                                                                                                                                                                                                                                                                                                                                                                                                                                                                                                                                                                                                                                                                                                                                                                                                                                                                                                                                                                                                                                                                                                                                                                                                                                                                                                                                                                                                                                                                                                                                                                                                                                                                                                                                                                                                                                                                                                                                                                                                                                                                                                                                                                                                                                                                                                                                                                                                                                                                                                                                                                                                                           |                                                                                      | Patient Name: <input style="width: 80%;" type="text"/>                   | Sex: M / F                                                            | Weight (kg): <input style="width: 65%;" type="text"/>                                                                                                                                                                                                                                                                                                                                                                                                                                                                                                                                                                                                                                                                                                                                                                                                                                                                                                                                                                                                | Current Village: <input style="width: 80%;" type="text"/> | Species: <i>Pf</i> / <i>Pv</i> / mix / <i>Pk</i> / <i>Po</i> / <i>Pm</i> | Date of G6PD test: <input style="width: 15%;" type="text"/> | G6PD value: <input style="width: 15%;" type="text"/> | Hemoglobin (SD Biosensor): <input style="width: 15%;" type="text"/> g/dL | Hemoglobin level (Hemocue): <input style="width: 15%;" type="text"/> | Day0 <input style="width: 15%;" type="text"/> g/dL Day3 <input style="width: 15%;" type="text"/> g/dL Day7 <input style="width: 15%;" type="text"/> g/dL | HF Name: <input style="width: 20%;" type="text"/> | HF Phone No.: <input style="width: 20%;" type="text"/>                                                                                                                                                                                                                                                                                                                                                                                                                                                                                                                                                                                                                                                                                                                                                                                                                                                                                                                                                                                                                                                                                                                                                                                                                                                                                                                                                                                                                                                                                                                                                                                                                                                                                                                                                                                                                                                                                                                                                                                                                                                                                                                                                                                                                                                                                                                                                                                                                                                                                                                                                                                          | Assigned Hospital Name: <input style="width: 20%;" type="text"/> | Assigned Hospital Phone No.: <input style="width: 40%;" type="text"/> |                                                                                                                                                                                                                                                                                                                                                                                                                                                                                                                                                                                                                                                                                                                                                                                                                                                                                                                                                                                                                                                                |                                                                                                                                                                                                                                                                                                                                                                                                                                                                                                                                                                                                                                                                                                                                                                                                                                                                                                                                                                                                                                                                                                                                                                                                                                                                                                                                                                                                                                                                                                                                                                                                                                                                                                                                                                                                                                                                                                                                                                                                                                                                                                                                                                                                                                                                                                                                                                                                                                                                                                                                                                                                                                                 |                        |                                                |                                                                                                                                                                                                                                                                                                                                                                                                                                                                                                                                                                                                                                                                                                                                                                                                                                                                                                                                                                                                                                                                |                                                |                                                 |                                                |                                                 |                                                |                                                 |                                                |                                                 |                                                |                                                 |                                                |                                                 |                                                                                                                                                                                                                                                                                                                                                                                                                                                                                                                                                                                                                                                                                                                                                                                                                                                                                                                                                                                                                                                                                                                                                                                              |                                                 |                                                |                                                 |                                                                                                                                                                                                                                                                                                                                                                                                                                                                                                                                                                                                                                                                                                                                                                                                                                                                                                                                                                                                                                                                                                                                                                                              |                                                 |                                              |                                                 |                                              |                                                 |                                              |                                                 |                                              |                                                 |                                              |                                                 |                                              |                                                 |                                              |                                                 |                                              |                                                 |                                              |                                                                                                                         |  |
| Patient Name: <input style="width: 80%;" type="text"/>                                                                                                                                                                                                                                                                                                                                                                                                                                                                                                                                                                                                                                                                                                                                                                                                                                                                                                                                                                                                                                                                                                                                                                                                                                                                                                                                                                                                                                                                                                                                                                                                                                                                                                                                                                                                                                                                                                                                                                                                                                                                                                                                                                                                                                                                                                                                                                                                                                                                                                                                                                                                                                                                                                                                                                                                                                                                                                                                                                                                                                                                                                                                                                                                                                                                                                                                                                                                                                                                                                                                                                                                                                                                                                                                                                                                                                                                                                                                                                                                                                                                                                                                                                                                                                                                                                                          | Sex: M / F                                                                           | Weight (kg): <input style="width: 65%;" type="text"/>                    | Current Village: <input style="width: 80%;" type="text"/>             | Species: <i>Pf</i> / <i>Pv</i> / mix / <i>Pk</i> / <i>Po</i> / <i>Pm</i>                                                                                                                                                                                                                                                                                                                                                                                                                                                                                                                                                                                                                                                                                                                                                                                                                                                                                                                                                                             |                                                           |                                                                          |                                                             |                                                      |                                                                          |                                                                      |                                                                                                                                                          |                                                   |                                                                                                                                                                                                                                                                                                                                                                                                                                                                                                                                                                                                                                                                                                                                                                                                                                                                                                                                                                                                                                                                                                                                                                                                                                                                                                                                                                                                                                                                                                                                                                                                                                                                                                                                                                                                                                                                                                                                                                                                                                                                                                                                                                                                                                                                                                                                                                                                                                                                                                                                                                                                                                                 |                                                                  |                                                                       |                                                                                                                                                                                                                                                                                                                                                                                                                                                                                                                                                                                                                                                                                                                                                                                                                                                                                                                                                                                                                                                                |                                                                                                                                                                                                                                                                                                                                                                                                                                                                                                                                                                                                                                                                                                                                                                                                                                                                                                                                                                                                                                                                                                                                                                                                                                                                                                                                                                                                                                                                                                                                                                                                                                                                                                                                                                                                                                                                                                                                                                                                                                                                                                                                                                                                                                                                                                                                                                                                                                                                                                                                                                                                                                                 |                        |                                                |                                                                                                                                                                                                                                                                                                                                                                                                                                                                                                                                                                                                                                                                                                                                                                                                                                                                                                                                                                                                                                                                |                                                |                                                 |                                                |                                                 |                                                |                                                 |                                                |                                                 |                                                |                                                 |                                                |                                                 |                                                                                                                                                                                                                                                                                                                                                                                                                                                                                                                                                                                                                                                                                                                                                                                                                                                                                                                                                                                                                                                                                                                                                                                              |                                                 |                                                |                                                 |                                                                                                                                                                                                                                                                                                                                                                                                                                                                                                                                                                                                                                                                                                                                                                                                                                                                                                                                                                                                                                                                                                                                                                                              |                                                 |                                              |                                                 |                                              |                                                 |                                              |                                                 |                                              |                                                 |                                              |                                                 |                                              |                                                 |                                              |                                                 |                                              |                                                 |                                              |                                                                                                                         |  |
| Date of G6PD test: <input style="width: 15%;" type="text"/>                                                                                                                                                                                                                                                                                                                                                                                                                                                                                                                                                                                                                                                                                                                                                                                                                                                                                                                                                                                                                                                                                                                                                                                                                                                                                                                                                                                                                                                                                                                                                                                                                                                                                                                                                                                                                                                                                                                                                                                                                                                                                                                                                                                                                                                                                                                                                                                                                                                                                                                                                                                                                                                                                                                                                                                                                                                                                                                                                                                                                                                                                                                                                                                                                                                                                                                                                                                                                                                                                                                                                                                                                                                                                                                                                                                                                                                                                                                                                                                                                                                                                                                                                                                                                                                                                                                     | G6PD value: <input style="width: 15%;" type="text"/>                                 | Hemoglobin (SD Biosensor): <input style="width: 15%;" type="text"/> g/dL | Hemoglobin level (Hemocue): <input style="width: 15%;" type="text"/>  | Day0 <input style="width: 15%;" type="text"/> g/dL Day3 <input style="width: 15%;" type="text"/> g/dL Day7 <input style="width: 15%;" type="text"/> g/dL                                                                                                                                                                                                                                                                                                                                                                                                                                                                                                                                                                                                                                                                                                                                                                                                                                                                                             |                                                           |                                                                          |                                                             |                                                      |                                                                          |                                                                      |                                                                                                                                                          |                                                   |                                                                                                                                                                                                                                                                                                                                                                                                                                                                                                                                                                                                                                                                                                                                                                                                                                                                                                                                                                                                                                                                                                                                                                                                                                                                                                                                                                                                                                                                                                                                                                                                                                                                                                                                                                                                                                                                                                                                                                                                                                                                                                                                                                                                                                                                                                                                                                                                                                                                                                                                                                                                                                                 |                                                                  |                                                                       |                                                                                                                                                                                                                                                                                                                                                                                                                                                                                                                                                                                                                                                                                                                                                                                                                                                                                                                                                                                                                                                                |                                                                                                                                                                                                                                                                                                                                                                                                                                                                                                                                                                                                                                                                                                                                                                                                                                                                                                                                                                                                                                                                                                                                                                                                                                                                                                                                                                                                                                                                                                                                                                                                                                                                                                                                                                                                                                                                                                                                                                                                                                                                                                                                                                                                                                                                                                                                                                                                                                                                                                                                                                                                                                                 |                        |                                                |                                                                                                                                                                                                                                                                                                                                                                                                                                                                                                                                                                                                                                                                                                                                                                                                                                                                                                                                                                                                                                                                |                                                |                                                 |                                                |                                                 |                                                |                                                 |                                                |                                                 |                                                |                                                 |                                                |                                                 |                                                                                                                                                                                                                                                                                                                                                                                                                                                                                                                                                                                                                                                                                                                                                                                                                                                                                                                                                                                                                                                                                                                                                                                              |                                                 |                                                |                                                 |                                                                                                                                                                                                                                                                                                                                                                                                                                                                                                                                                                                                                                                                                                                                                                                                                                                                                                                                                                                                                                                                                                                                                                                              |                                                 |                                              |                                                 |                                              |                                                 |                                              |                                                 |                                              |                                                 |                                              |                                                 |                                              |                                                 |                                              |                                                 |                                              |                                                 |                                              |                                                                                                                         |  |
| HF Name: <input style="width: 20%;" type="text"/>                                                                                                                                                                                                                                                                                                                                                                                                                                                                                                                                                                                                                                                                                                                                                                                                                                                                                                                                                                                                                                                                                                                                                                                                                                                                                                                                                                                                                                                                                                                                                                                                                                                                                                                                                                                                                                                                                                                                                                                                                                                                                                                                                                                                                                                                                                                                                                                                                                                                                                                                                                                                                                                                                                                                                                                                                                                                                                                                                                                                                                                                                                                                                                                                                                                                                                                                                                                                                                                                                                                                                                                                                                                                                                                                                                                                                                                                                                                                                                                                                                                                                                                                                                                                                                                                                                                               | HF Phone No.: <input style="width: 20%;" type="text"/>                               | Assigned Hospital Name: <input style="width: 20%;" type="text"/>         | Assigned Hospital Phone No.: <input style="width: 40%;" type="text"/> |                                                                                                                                                                                                                                                                                                                                                                                                                                                                                                                                                                                                                                                                                                                                                                                                                                                                                                                                                                                                                                                      |                                                           |                                                                          |                                                             |                                                      |                                                                          |                                                                      |                                                                                                                                                          |                                                   |                                                                                                                                                                                                                                                                                                                                                                                                                                                                                                                                                                                                                                                                                                                                                                                                                                                                                                                                                                                                                                                                                                                                                                                                                                                                                                                                                                                                                                                                                                                                                                                                                                                                                                                                                                                                                                                                                                                                                                                                                                                                                                                                                                                                                                                                                                                                                                                                                                                                                                                                                                                                                                                 |                                                                  |                                                                       |                                                                                                                                                                                                                                                                                                                                                                                                                                                                                                                                                                                                                                                                                                                                                                                                                                                                                                                                                                                                                                                                |                                                                                                                                                                                                                                                                                                                                                                                                                                                                                                                                                                                                                                                                                                                                                                                                                                                                                                                                                                                                                                                                                                                                                                                                                                                                                                                                                                                                                                                                                                                                                                                                                                                                                                                                                                                                                                                                                                                                                                                                                                                                                                                                                                                                                                                                                                                                                                                                                                                                                                                                                                                                                                                 |                        |                                                |                                                                                                                                                                                                                                                                                                                                                                                                                                                                                                                                                                                                                                                                                                                                                                                                                                                                                                                                                                                                                                                                |                                                |                                                 |                                                |                                                 |                                                |                                                 |                                                |                                                 |                                                |                                                 |                                                |                                                 |                                                                                                                                                                                                                                                                                                                                                                                                                                                                                                                                                                                                                                                                                                                                                                                                                                                                                                                                                                                                                                                                                                                                                                                              |                                                 |                                                |                                                 |                                                                                                                                                                                                                                                                                                                                                                                                                                                                                                                                                                                                                                                                                                                                                                                                                                                                                                                                                                                                                                                                                                                                                                                              |                                                 |                                              |                                                 |                                              |                                                 |                                              |                                                 |                                              |                                                 |                                              |                                                 |                                              |                                                 |                                              |                                                 |                                              |                                                 |                                              |                                                                                                                         |  |
| <table style="width: 100%; border: none;"> <tr> <th style="background-color: #ffcc00; text-align: center; padding: 5px;">ACT (for all patients)</th> <th style="background-color: #6495ed; text-align: center; padding: 5px;">PRIMAQUINE (only for <i>Pv</i>, <i>Po</i> &amp; mixed patients)</th> </tr> <tr> <td style="vertical-align: top; padding: 5px;"> <table style="width: 100%; border: none;"> <tr> <th style="text-align: left; font-size: small;">Date</th> <th style="text-align: left; font-size: small;">Checked when completed</th> </tr> <tr><td>DAY 0 <input style="width: 50%;" type="text"/></td><td><input style="width: 40%;" type="checkbox"/></td></tr> <tr><td>DAY 1 <input style="width: 50%;" type="text"/></td><td><input style="width: 40%;" type="checkbox"/></td></tr> <tr><td>DAY 2 <input style="width: 50%;" type="text"/></td><td><input style="width: 40%;" type="checkbox"/></td></tr> </table> <br/> <div style="background-color: #90ee90; text-align: center; padding: 5px; font-weight: bold;">SLD PRIMAQUINE (only for <i>Pf</i> patients)</div> <table style="width: 100%; border: none;"> <tr> <th style="text-align: left; font-size: small;">Date</th> <th style="text-align: left; font-size: small;">Checked when completed</th> </tr> <tr><td>DAY 0 <input style="width: 50%;" type="text"/></td><td><input style="width: 40%;" type="checkbox"/></td></tr> </table> </td> <td style="vertical-align: top; padding: 5px;"> <table style="width: 100%; border: none;"> <tr> <th style="background-color: #6495ed; text-align: center; font-size: small;">G6PD normal (7-day PQ)</th> <th style="background-color: #6495ed; text-align: center; font-size: small;">G6PD intermediate &amp; deficient (8week PQ)</th> </tr> <tr> <td style="padding: 5px;"> <table style="width: 100%; border: none;"> <tr> <th style="text-align: left; font-size: small;">Date</th> <th style="text-align: left; font-size: small;">Checked when completed</th> </tr> <tr><td>DAY 0 <input style="width: 50%;" type="text"/></td><td><input style="width: 40%;" type="checkbox"/></td></tr> <tr><td>DAY 1 <input style="width: 50%;" type="text"/></td><td><input style="width: 40%;" type="checkbox"/></td></tr> <tr><td>DAY 2 <input style="width: 50%;" type="text"/></td><td><input style="width: 40%;" type="checkbox"/></td></tr> <tr><td>DAY 3 <input style="width: 50%;" type="text"/></td><td><input style="width: 40%;" type="checkbox"/></td></tr> <tr><td>DAY 4 <input style="width: 50%;" type="text"/></td><td><input style="width: 40%;" type="checkbox"/></td></tr> <tr><td>DAY 5 <input style="width: 50%;" type="text"/></td><td><input style="width: 40%;" type="checkbox"/></td></tr> <tr><td>DAY 6 <input style="width: 50%;" type="text"/></td><td><input style="width: 40%;" type="checkbox"/></td></tr> </table> </td> <td style="padding: 5px;"> <table style="width: 100%; border: none;"> <tr> <th style="text-align: left; font-size: small;">Date</th> <th style="text-align: left; font-size: small;">Checked when completed</th> </tr> <tr><td>Week 1 <input style="width: 50%;" type="text"/></td><td><input style="width: 40%;" type="checkbox"/></td></tr> <tr><td>Week 2 <input style="width: 50%;" type="text"/></td><td><input style="width: 40%;" type="checkbox"/></td></tr> <tr><td>Week 3 <input style="width: 50%;" type="text"/></td><td><input style="width: 40%;" type="checkbox"/></td></tr> <tr><td>Week 4 <input style="width: 50%;" type="text"/></td><td><input style="width: 40%;" type="checkbox"/></td></tr> <tr><td>Week 5 <input style="width: 50%;" type="text"/></td><td><input style="width: 40%;" type="checkbox"/></td></tr> <tr><td>Week 6 <input style="width: 50%;" type="text"/></td><td><input style="width: 40%;" type="checkbox"/></td></tr> <tr><td>Week 7 <input style="width: 50%;" type="text"/></td><td><input style="width: 40%;" type="checkbox"/></td></tr> <tr><td>Week 8 <input style="width: 50%;" type="text"/></td><td><input style="width: 40%;" type="checkbox"/></td></tr> </table> </td> </tr> </table> </td> </tr> <tr> <td colspan="2" style="text-align: center; padding: 5px; background-color: #f08080;"> <b>Please take the medications with food to reduce stomach irritation. Please take this card with you all the time!</b> </td> </tr> </table> |                                                                                      | ACT (for all patients)                                                   | PRIMAQUINE (only for <i>Pv</i> , <i>Po</i> & mixed patients)          | <table style="width: 100%; border: none;"> <tr> <th style="text-align: left; font-size: small;">Date</th> <th style="text-align: left; font-size: small;">Checked when completed</th> </tr> <tr><td>DAY 0 <input style="width: 50%;" type="text"/></td><td><input style="width: 40%;" type="checkbox"/></td></tr> <tr><td>DAY 1 <input style="width: 50%;" type="text"/></td><td><input style="width: 40%;" type="checkbox"/></td></tr> <tr><td>DAY 2 <input style="width: 50%;" type="text"/></td><td><input style="width: 40%;" type="checkbox"/></td></tr> </table><br><div style="background-color: #90ee90; text-align: center; padding: 5px; font-weight: bold;">SLD PRIMAQUINE (only for <i>Pf</i> patients)</div> <table style="width: 100%; border: none;"> <tr> <th style="text-align: left; font-size: small;">Date</th> <th style="text-align: left; font-size: small;">Checked when completed</th> </tr> <tr><td>DAY 0 <input style="width: 50%;" type="text"/></td><td><input style="width: 40%;" type="checkbox"/></td></tr> </table> | Date                                                      | Checked when completed                                                   | DAY 0 <input style="width: 50%;" type="text"/>              | <input style="width: 40%;" type="checkbox"/>         | DAY 1 <input style="width: 50%;" type="text"/>                           | <input style="width: 40%;" type="checkbox"/>                         | DAY 2 <input style="width: 50%;" type="text"/>                                                                                                           | <input style="width: 40%;" type="checkbox"/>      | Date                                                                                                                                                                                                                                                                                                                                                                                                                                                                                                                                                                                                                                                                                                                                                                                                                                                                                                                                                                                                                                                                                                                                                                                                                                                                                                                                                                                                                                                                                                                                                                                                                                                                                                                                                                                                                                                                                                                                                                                                                                                                                                                                                                                                                                                                                                                                                                                                                                                                                                                                                                                                                                            | Checked when completed                                           | DAY 0 <input style="width: 50%;" type="text"/>                        | <input style="width: 40%;" type="checkbox"/>                                                                                                                                                                                                                                                                                                                                                                                                                                                                                                                                                                                                                                                                                                                                                                                                                                                                                                                                                                                                                   | <table style="width: 100%; border: none;"> <tr> <th style="background-color: #6495ed; text-align: center; font-size: small;">G6PD normal (7-day PQ)</th> <th style="background-color: #6495ed; text-align: center; font-size: small;">G6PD intermediate &amp; deficient (8week PQ)</th> </tr> <tr> <td style="padding: 5px;"> <table style="width: 100%; border: none;"> <tr> <th style="text-align: left; font-size: small;">Date</th> <th style="text-align: left; font-size: small;">Checked when completed</th> </tr> <tr><td>DAY 0 <input style="width: 50%;" type="text"/></td><td><input style="width: 40%;" type="checkbox"/></td></tr> <tr><td>DAY 1 <input style="width: 50%;" type="text"/></td><td><input style="width: 40%;" type="checkbox"/></td></tr> <tr><td>DAY 2 <input style="width: 50%;" type="text"/></td><td><input style="width: 40%;" type="checkbox"/></td></tr> <tr><td>DAY 3 <input style="width: 50%;" type="text"/></td><td><input style="width: 40%;" type="checkbox"/></td></tr> <tr><td>DAY 4 <input style="width: 50%;" type="text"/></td><td><input style="width: 40%;" type="checkbox"/></td></tr> <tr><td>DAY 5 <input style="width: 50%;" type="text"/></td><td><input style="width: 40%;" type="checkbox"/></td></tr> <tr><td>DAY 6 <input style="width: 50%;" type="text"/></td><td><input style="width: 40%;" type="checkbox"/></td></tr> </table> </td> <td style="padding: 5px;"> <table style="width: 100%; border: none;"> <tr> <th style="text-align: left; font-size: small;">Date</th> <th style="text-align: left; font-size: small;">Checked when completed</th> </tr> <tr><td>Week 1 <input style="width: 50%;" type="text"/></td><td><input style="width: 40%;" type="checkbox"/></td></tr> <tr><td>Week 2 <input style="width: 50%;" type="text"/></td><td><input style="width: 40%;" type="checkbox"/></td></tr> <tr><td>Week 3 <input style="width: 50%;" type="text"/></td><td><input style="width: 40%;" type="checkbox"/></td></tr> <tr><td>Week 4 <input style="width: 50%;" type="text"/></td><td><input style="width: 40%;" type="checkbox"/></td></tr> <tr><td>Week 5 <input style="width: 50%;" type="text"/></td><td><input style="width: 40%;" type="checkbox"/></td></tr> <tr><td>Week 6 <input style="width: 50%;" type="text"/></td><td><input style="width: 40%;" type="checkbox"/></td></tr> <tr><td>Week 7 <input style="width: 50%;" type="text"/></td><td><input style="width: 40%;" type="checkbox"/></td></tr> <tr><td>Week 8 <input style="width: 50%;" type="text"/></td><td><input style="width: 40%;" type="checkbox"/></td></tr> </table> </td> </tr> </table> | G6PD normal (7-day PQ) | G6PD intermediate & deficient (8week PQ)       | <table style="width: 100%; border: none;"> <tr> <th style="text-align: left; font-size: small;">Date</th> <th style="text-align: left; font-size: small;">Checked when completed</th> </tr> <tr><td>DAY 0 <input style="width: 50%;" type="text"/></td><td><input style="width: 40%;" type="checkbox"/></td></tr> <tr><td>DAY 1 <input style="width: 50%;" type="text"/></td><td><input style="width: 40%;" type="checkbox"/></td></tr> <tr><td>DAY 2 <input style="width: 50%;" type="text"/></td><td><input style="width: 40%;" type="checkbox"/></td></tr> <tr><td>DAY 3 <input style="width: 50%;" type="text"/></td><td><input style="width: 40%;" type="checkbox"/></td></tr> <tr><td>DAY 4 <input style="width: 50%;" type="text"/></td><td><input style="width: 40%;" type="checkbox"/></td></tr> <tr><td>DAY 5 <input style="width: 50%;" type="text"/></td><td><input style="width: 40%;" type="checkbox"/></td></tr> <tr><td>DAY 6 <input style="width: 50%;" type="text"/></td><td><input style="width: 40%;" type="checkbox"/></td></tr> </table> | Date                                           | Checked when completed                          | DAY 0 <input style="width: 50%;" type="text"/> | <input style="width: 40%;" type="checkbox"/>    | DAY 1 <input style="width: 50%;" type="text"/> | <input style="width: 40%;" type="checkbox"/>    | DAY 2 <input style="width: 50%;" type="text"/> | <input style="width: 40%;" type="checkbox"/>    | DAY 3 <input style="width: 50%;" type="text"/> | <input style="width: 40%;" type="checkbox"/>    | DAY 4 <input style="width: 50%;" type="text"/> | <input style="width: 40%;" type="checkbox"/>    | DAY 5 <input style="width: 50%;" type="text"/>                                                                                                                                                                                                                                                                                                                                                                                                                                                                                                                                                                                                                                                                                                                                                                                                                                                                                                                                                                                                                                                                                                                                               | <input style="width: 40%;" type="checkbox"/>    | DAY 6 <input style="width: 50%;" type="text"/> | <input style="width: 40%;" type="checkbox"/>    | <table style="width: 100%; border: none;"> <tr> <th style="text-align: left; font-size: small;">Date</th> <th style="text-align: left; font-size: small;">Checked when completed</th> </tr> <tr><td>Week 1 <input style="width: 50%;" type="text"/></td><td><input style="width: 40%;" type="checkbox"/></td></tr> <tr><td>Week 2 <input style="width: 50%;" type="text"/></td><td><input style="width: 40%;" type="checkbox"/></td></tr> <tr><td>Week 3 <input style="width: 50%;" type="text"/></td><td><input style="width: 40%;" type="checkbox"/></td></tr> <tr><td>Week 4 <input style="width: 50%;" type="text"/></td><td><input style="width: 40%;" type="checkbox"/></td></tr> <tr><td>Week 5 <input style="width: 50%;" type="text"/></td><td><input style="width: 40%;" type="checkbox"/></td></tr> <tr><td>Week 6 <input style="width: 50%;" type="text"/></td><td><input style="width: 40%;" type="checkbox"/></td></tr> <tr><td>Week 7 <input style="width: 50%;" type="text"/></td><td><input style="width: 40%;" type="checkbox"/></td></tr> <tr><td>Week 8 <input style="width: 50%;" type="text"/></td><td><input style="width: 40%;" type="checkbox"/></td></tr> </table> | Date                                            | Checked when completed                       | Week 1 <input style="width: 50%;" type="text"/> | <input style="width: 40%;" type="checkbox"/> | Week 2 <input style="width: 50%;" type="text"/> | <input style="width: 40%;" type="checkbox"/> | Week 3 <input style="width: 50%;" type="text"/> | <input style="width: 40%;" type="checkbox"/> | Week 4 <input style="width: 50%;" type="text"/> | <input style="width: 40%;" type="checkbox"/> | Week 5 <input style="width: 50%;" type="text"/> | <input style="width: 40%;" type="checkbox"/> | Week 6 <input style="width: 50%;" type="text"/> | <input style="width: 40%;" type="checkbox"/> | Week 7 <input style="width: 50%;" type="text"/> | <input style="width: 40%;" type="checkbox"/> | Week 8 <input style="width: 50%;" type="text"/> | <input style="width: 40%;" type="checkbox"/> | <b>Please take the medications with food to reduce stomach irritation. Please take this card with you all the time!</b> |  |
| ACT (for all patients)                                                                                                                                                                                                                                                                                                                                                                                                                                                                                                                                                                                                                                                                                                                                                                                                                                                                                                                                                                                                                                                                                                                                                                                                                                                                                                                                                                                                                                                                                                                                                                                                                                                                                                                                                                                                                                                                                                                                                                                                                                                                                                                                                                                                                                                                                                                                                                                                                                                                                                                                                                                                                                                                                                                                                                                                                                                                                                                                                                                                                                                                                                                                                                                                                                                                                                                                                                                                                                                                                                                                                                                                                                                                                                                                                                                                                                                                                                                                                                                                                                                                                                                                                                                                                                                                                                                                                          | PRIMAQUINE (only for <i>Pv</i> , <i>Po</i> & mixed patients)                         |                                                                          |                                                                       |                                                                                                                                                                                                                                                                                                                                                                                                                                                                                                                                                                                                                                                                                                                                                                                                                                                                                                                                                                                                                                                      |                                                           |                                                                          |                                                             |                                                      |                                                                          |                                                                      |                                                                                                                                                          |                                                   |                                                                                                                                                                                                                                                                                                                                                                                                                                                                                                                                                                                                                                                                                                                                                                                                                                                                                                                                                                                                                                                                                                                                                                                                                                                                                                                                                                                                                                                                                                                                                                                                                                                                                                                                                                                                                                                                                                                                                                                                                                                                                                                                                                                                                                                                                                                                                                                                                                                                                                                                                                                                                                                 |                                                                  |                                                                       |                                                                                                                                                                                                                                                                                                                                                                                                                                                                                                                                                                                                                                                                                                                                                                                                                                                                                                                                                                                                                                                                |                                                                                                                                                                                                                                                                                                                                                                                                                                                                                                                                                                                                                                                                                                                                                                                                                                                                                                                                                                                                                                                                                                                                                                                                                                                                                                                                                                                                                                                                                                                                                                                                                                                                                                                                                                                                                                                                                                                                                                                                                                                                                                                                                                                                                                                                                                                                                                                                                                                                                                                                                                                                                                                 |                        |                                                |                                                                                                                                                                                                                                                                                                                                                                                                                                                                                                                                                                                                                                                                                                                                                                                                                                                                                                                                                                                                                                                                |                                                |                                                 |                                                |                                                 |                                                |                                                 |                                                |                                                 |                                                |                                                 |                                                |                                                 |                                                                                                                                                                                                                                                                                                                                                                                                                                                                                                                                                                                                                                                                                                                                                                                                                                                                                                                                                                                                                                                                                                                                                                                              |                                                 |                                                |                                                 |                                                                                                                                                                                                                                                                                                                                                                                                                                                                                                                                                                                                                                                                                                                                                                                                                                                                                                                                                                                                                                                                                                                                                                                              |                                                 |                                              |                                                 |                                              |                                                 |                                              |                                                 |                                              |                                                 |                                              |                                                 |                                              |                                                 |                                              |                                                 |                                              |                                                 |                                              |                                                                                                                         |  |
| <table style="width: 100%; border: none;"> <tr> <th style="text-align: left; font-size: small;">Date</th> <th style="text-align: left; font-size: small;">Checked when completed</th> </tr> <tr><td>DAY 0 <input style="width: 50%;" type="text"/></td><td><input style="width: 40%;" type="checkbox"/></td></tr> <tr><td>DAY 1 <input style="width: 50%;" type="text"/></td><td><input style="width: 40%;" type="checkbox"/></td></tr> <tr><td>DAY 2 <input style="width: 50%;" type="text"/></td><td><input style="width: 40%;" type="checkbox"/></td></tr> </table><br><div style="background-color: #90ee90; text-align: center; padding: 5px; font-weight: bold;">SLD PRIMAQUINE (only for <i>Pf</i> patients)</div> <table style="width: 100%; border: none;"> <tr> <th style="text-align: left; font-size: small;">Date</th> <th style="text-align: left; font-size: small;">Checked when completed</th> </tr> <tr><td>DAY 0 <input style="width: 50%;" type="text"/></td><td><input style="width: 40%;" type="checkbox"/></td></tr> </table>                                                                                                                                                                                                                                                                                                                                                                                                                                                                                                                                                                                                                                                                                                                                                                                                                                                                                                                                                                                                                                                                                                                                                                                                                                                                                                                                                                                                                                                                                                                                                                                                                                                                                                                                                                                                                                                                                                                                                                                                                                                                                                                                                                                                                                                                                                                                                                                                                                                                                                                                                                                                                                                                                                                                                                                                                                                                                                                                                                                                                                                                                                                                                                                                                                                                                                                            | Date                                                                                 | Checked when completed                                                   | DAY 0 <input style="width: 50%;" type="text"/>                        | <input style="width: 40%;" type="checkbox"/>                                                                                                                                                                                                                                                                                                                                                                                                                                                                                                                                                                                                                                                                                                                                                                                                                                                                                                                                                                                                         | DAY 1 <input style="width: 50%;" type="text"/>            | <input style="width: 40%;" type="checkbox"/>                             | DAY 2 <input style="width: 50%;" type="text"/>              | <input style="width: 40%;" type="checkbox"/>         | Date                                                                     | Checked when completed                                               | DAY 0 <input style="width: 50%;" type="text"/>                                                                                                           | <input style="width: 40%;" type="checkbox"/>      | <table style="width: 100%; border: none;"> <tr> <th style="background-color: #6495ed; text-align: center; font-size: small;">G6PD normal (7-day PQ)</th> <th style="background-color: #6495ed; text-align: center; font-size: small;">G6PD intermediate &amp; deficient (8week PQ)</th> </tr> <tr> <td style="padding: 5px;"> <table style="width: 100%; border: none;"> <tr> <th style="text-align: left; font-size: small;">Date</th> <th style="text-align: left; font-size: small;">Checked when completed</th> </tr> <tr><td>DAY 0 <input style="width: 50%;" type="text"/></td><td><input style="width: 40%;" type="checkbox"/></td></tr> <tr><td>DAY 1 <input style="width: 50%;" type="text"/></td><td><input style="width: 40%;" type="checkbox"/></td></tr> <tr><td>DAY 2 <input style="width: 50%;" type="text"/></td><td><input style="width: 40%;" type="checkbox"/></td></tr> <tr><td>DAY 3 <input style="width: 50%;" type="text"/></td><td><input style="width: 40%;" type="checkbox"/></td></tr> <tr><td>DAY 4 <input style="width: 50%;" type="text"/></td><td><input style="width: 40%;" type="checkbox"/></td></tr> <tr><td>DAY 5 <input style="width: 50%;" type="text"/></td><td><input style="width: 40%;" type="checkbox"/></td></tr> <tr><td>DAY 6 <input style="width: 50%;" type="text"/></td><td><input style="width: 40%;" type="checkbox"/></td></tr> </table> </td> <td style="padding: 5px;"> <table style="width: 100%; border: none;"> <tr> <th style="text-align: left; font-size: small;">Date</th> <th style="text-align: left; font-size: small;">Checked when completed</th> </tr> <tr><td>Week 1 <input style="width: 50%;" type="text"/></td><td><input style="width: 40%;" type="checkbox"/></td></tr> <tr><td>Week 2 <input style="width: 50%;" type="text"/></td><td><input style="width: 40%;" type="checkbox"/></td></tr> <tr><td>Week 3 <input style="width: 50%;" type="text"/></td><td><input style="width: 40%;" type="checkbox"/></td></tr> <tr><td>Week 4 <input style="width: 50%;" type="text"/></td><td><input style="width: 40%;" type="checkbox"/></td></tr> <tr><td>Week 5 <input style="width: 50%;" type="text"/></td><td><input style="width: 40%;" type="checkbox"/></td></tr> <tr><td>Week 6 <input style="width: 50%;" type="text"/></td><td><input style="width: 40%;" type="checkbox"/></td></tr> <tr><td>Week 7 <input style="width: 50%;" type="text"/></td><td><input style="width: 40%;" type="checkbox"/></td></tr> <tr><td>Week 8 <input style="width: 50%;" type="text"/></td><td><input style="width: 40%;" type="checkbox"/></td></tr> </table> </td> </tr> </table> | G6PD normal (7-day PQ)                                           | G6PD intermediate & deficient (8week PQ)                              | <table style="width: 100%; border: none;"> <tr> <th style="text-align: left; font-size: small;">Date</th> <th style="text-align: left; font-size: small;">Checked when completed</th> </tr> <tr><td>DAY 0 <input style="width: 50%;" type="text"/></td><td><input style="width: 40%;" type="checkbox"/></td></tr> <tr><td>DAY 1 <input style="width: 50%;" type="text"/></td><td><input style="width: 40%;" type="checkbox"/></td></tr> <tr><td>DAY 2 <input style="width: 50%;" type="text"/></td><td><input style="width: 40%;" type="checkbox"/></td></tr> <tr><td>DAY 3 <input style="width: 50%;" type="text"/></td><td><input style="width: 40%;" type="checkbox"/></td></tr> <tr><td>DAY 4 <input style="width: 50%;" type="text"/></td><td><input style="width: 40%;" type="checkbox"/></td></tr> <tr><td>DAY 5 <input style="width: 50%;" type="text"/></td><td><input style="width: 40%;" type="checkbox"/></td></tr> <tr><td>DAY 6 <input style="width: 50%;" type="text"/></td><td><input style="width: 40%;" type="checkbox"/></td></tr> </table> | Date                                                                                                                                                                                                                                                                                                                                                                                                                                                                                                                                                                                                                                                                                                                                                                                                                                                                                                                                                                                                                                                                                                                                                                                                                                                                                                                                                                                                                                                                                                                                                                                                                                                                                                                                                                                                                                                                                                                                                                                                                                                                                                                                                                                                                                                                                                                                                                                                                                                                                                                                                                                                                                            | Checked when completed | DAY 0 <input style="width: 50%;" type="text"/> | <input style="width: 40%;" type="checkbox"/>                                                                                                                                                                                                                                                                                                                                                                                                                                                                                                                                                                                                                                                                                                                                                                                                                                                                                                                                                                                                                   | DAY 1 <input style="width: 50%;" type="text"/> | <input style="width: 40%;" type="checkbox"/>    | DAY 2 <input style="width: 50%;" type="text"/> | <input style="width: 40%;" type="checkbox"/>    | DAY 3 <input style="width: 50%;" type="text"/> | <input style="width: 40%;" type="checkbox"/>    | DAY 4 <input style="width: 50%;" type="text"/> | <input style="width: 40%;" type="checkbox"/>    | DAY 5 <input style="width: 50%;" type="text"/> | <input style="width: 40%;" type="checkbox"/>    | DAY 6 <input style="width: 50%;" type="text"/> | <input style="width: 40%;" type="checkbox"/>    | <table style="width: 100%; border: none;"> <tr> <th style="text-align: left; font-size: small;">Date</th> <th style="text-align: left; font-size: small;">Checked when completed</th> </tr> <tr><td>Week 1 <input style="width: 50%;" type="text"/></td><td><input style="width: 40%;" type="checkbox"/></td></tr> <tr><td>Week 2 <input style="width: 50%;" type="text"/></td><td><input style="width: 40%;" type="checkbox"/></td></tr> <tr><td>Week 3 <input style="width: 50%;" type="text"/></td><td><input style="width: 40%;" type="checkbox"/></td></tr> <tr><td>Week 4 <input style="width: 50%;" type="text"/></td><td><input style="width: 40%;" type="checkbox"/></td></tr> <tr><td>Week 5 <input style="width: 50%;" type="text"/></td><td><input style="width: 40%;" type="checkbox"/></td></tr> <tr><td>Week 6 <input style="width: 50%;" type="text"/></td><td><input style="width: 40%;" type="checkbox"/></td></tr> <tr><td>Week 7 <input style="width: 50%;" type="text"/></td><td><input style="width: 40%;" type="checkbox"/></td></tr> <tr><td>Week 8 <input style="width: 50%;" type="text"/></td><td><input style="width: 40%;" type="checkbox"/></td></tr> </table> | Date                                            | Checked when completed                         | Week 1 <input style="width: 50%;" type="text"/> | <input style="width: 40%;" type="checkbox"/>                                                                                                                                                                                                                                                                                                                                                                                                                                                                                                                                                                                                                                                                                                                                                                                                                                                                                                                                                                                                                                                                                                                                                 | Week 2 <input style="width: 50%;" type="text"/> | <input style="width: 40%;" type="checkbox"/> | Week 3 <input style="width: 50%;" type="text"/> | <input style="width: 40%;" type="checkbox"/> | Week 4 <input style="width: 50%;" type="text"/> | <input style="width: 40%;" type="checkbox"/> | Week 5 <input style="width: 50%;" type="text"/> | <input style="width: 40%;" type="checkbox"/> | Week 6 <input style="width: 50%;" type="text"/> | <input style="width: 40%;" type="checkbox"/> | Week 7 <input style="width: 50%;" type="text"/> | <input style="width: 40%;" type="checkbox"/> | Week 8 <input style="width: 50%;" type="text"/> | <input style="width: 40%;" type="checkbox"/> |                                                 |                                              |                                                 |                                              |                                                                                                                         |  |
| Date                                                                                                                                                                                                                                                                                                                                                                                                                                                                                                                                                                                                                                                                                                                                                                                                                                                                                                                                                                                                                                                                                                                                                                                                                                                                                                                                                                                                                                                                                                                                                                                                                                                                                                                                                                                                                                                                                                                                                                                                                                                                                                                                                                                                                                                                                                                                                                                                                                                                                                                                                                                                                                                                                                                                                                                                                                                                                                                                                                                                                                                                                                                                                                                                                                                                                                                                                                                                                                                                                                                                                                                                                                                                                                                                                                                                                                                                                                                                                                                                                                                                                                                                                                                                                                                                                                                                                                            | Checked when completed                                                               |                                                                          |                                                                       |                                                                                                                                                                                                                                                                                                                                                                                                                                                                                                                                                                                                                                                                                                                                                                                                                                                                                                                                                                                                                                                      |                                                           |                                                                          |                                                             |                                                      |                                                                          |                                                                      |                                                                                                                                                          |                                                   |                                                                                                                                                                                                                                                                                                                                                                                                                                                                                                                                                                                                                                                                                                                                                                                                                                                                                                                                                                                                                                                                                                                                                                                                                                                                                                                                                                                                                                                                                                                                                                                                                                                                                                                                                                                                                                                                                                                                                                                                                                                                                                                                                                                                                                                                                                                                                                                                                                                                                                                                                                                                                                                 |                                                                  |                                                                       |                                                                                                                                                                                                                                                                                                                                                                                                                                                                                                                                                                                                                                                                                                                                                                                                                                                                                                                                                                                                                                                                |                                                                                                                                                                                                                                                                                                                                                                                                                                                                                                                                                                                                                                                                                                                                                                                                                                                                                                                                                                                                                                                                                                                                                                                                                                                                                                                                                                                                                                                                                                                                                                                                                                                                                                                                                                                                                                                                                                                                                                                                                                                                                                                                                                                                                                                                                                                                                                                                                                                                                                                                                                                                                                                 |                        |                                                |                                                                                                                                                                                                                                                                                                                                                                                                                                                                                                                                                                                                                                                                                                                                                                                                                                                                                                                                                                                                                                                                |                                                |                                                 |                                                |                                                 |                                                |                                                 |                                                |                                                 |                                                |                                                 |                                                |                                                 |                                                                                                                                                                                                                                                                                                                                                                                                                                                                                                                                                                                                                                                                                                                                                                                                                                                                                                                                                                                                                                                                                                                                                                                              |                                                 |                                                |                                                 |                                                                                                                                                                                                                                                                                                                                                                                                                                                                                                                                                                                                                                                                                                                                                                                                                                                                                                                                                                                                                                                                                                                                                                                              |                                                 |                                              |                                                 |                                              |                                                 |                                              |                                                 |                                              |                                                 |                                              |                                                 |                                              |                                                 |                                              |                                                 |                                              |                                                 |                                              |                                                                                                                         |  |
| DAY 0 <input style="width: 50%;" type="text"/>                                                                                                                                                                                                                                                                                                                                                                                                                                                                                                                                                                                                                                                                                                                                                                                                                                                                                                                                                                                                                                                                                                                                                                                                                                                                                                                                                                                                                                                                                                                                                                                                                                                                                                                                                                                                                                                                                                                                                                                                                                                                                                                                                                                                                                                                                                                                                                                                                                                                                                                                                                                                                                                                                                                                                                                                                                                                                                                                                                                                                                                                                                                                                                                                                                                                                                                                                                                                                                                                                                                                                                                                                                                                                                                                                                                                                                                                                                                                                                                                                                                                                                                                                                                                                                                                                                                                  | <input style="width: 40%;" type="checkbox"/>                                         |                                                                          |                                                                       |                                                                                                                                                                                                                                                                                                                                                                                                                                                                                                                                                                                                                                                                                                                                                                                                                                                                                                                                                                                                                                                      |                                                           |                                                                          |                                                             |                                                      |                                                                          |                                                                      |                                                                                                                                                          |                                                   |                                                                                                                                                                                                                                                                                                                                                                                                                                                                                                                                                                                                                                                                                                                                                                                                                                                                                                                                                                                                                                                                                                                                                                                                                                                                                                                                                                                                                                                                                                                                                                                                                                                                                                                                                                                                                                                                                                                                                                                                                                                                                                                                                                                                                                                                                                                                                                                                                                                                                                                                                                                                                                                 |                                                                  |                                                                       |                                                                                                                                                                                                                                                                                                                                                                                                                                                                                                                                                                                                                                                                                                                                                                                                                                                                                                                                                                                                                                                                |                                                                                                                                                                                                                                                                                                                                                                                                                                                                                                                                                                                                                                                                                                                                                                                                                                                                                                                                                                                                                                                                                                                                                                                                                                                                                                                                                                                                                                                                                                                                                                                                                                                                                                                                                                                                                                                                                                                                                                                                                                                                                                                                                                                                                                                                                                                                                                                                                                                                                                                                                                                                                                                 |                        |                                                |                                                                                                                                                                                                                                                                                                                                                                                                                                                                                                                                                                                                                                                                                                                                                                                                                                                                                                                                                                                                                                                                |                                                |                                                 |                                                |                                                 |                                                |                                                 |                                                |                                                 |                                                |                                                 |                                                |                                                 |                                                                                                                                                                                                                                                                                                                                                                                                                                                                                                                                                                                                                                                                                                                                                                                                                                                                                                                                                                                                                                                                                                                                                                                              |                                                 |                                                |                                                 |                                                                                                                                                                                                                                                                                                                                                                                                                                                                                                                                                                                                                                                                                                                                                                                                                                                                                                                                                                                                                                                                                                                                                                                              |                                                 |                                              |                                                 |                                              |                                                 |                                              |                                                 |                                              |                                                 |                                              |                                                 |                                              |                                                 |                                              |                                                 |                                              |                                                 |                                              |                                                                                                                         |  |
| DAY 1 <input style="width: 50%;" type="text"/>                                                                                                                                                                                                                                                                                                                                                                                                                                                                                                                                                                                                                                                                                                                                                                                                                                                                                                                                                                                                                                                                                                                                                                                                                                                                                                                                                                                                                                                                                                                                                                                                                                                                                                                                                                                                                                                                                                                                                                                                                                                                                                                                                                                                                                                                                                                                                                                                                                                                                                                                                                                                                                                                                                                                                                                                                                                                                                                                                                                                                                                                                                                                                                                                                                                                                                                                                                                                                                                                                                                                                                                                                                                                                                                                                                                                                                                                                                                                                                                                                                                                                                                                                                                                                                                                                                                                  | <input style="width: 40%;" type="checkbox"/>                                         |                                                                          |                                                                       |                                                                                                                                                                                                                                                                                                                                                                                                                                                                                                                                                                                                                                                                                                                                                                                                                                                                                                                                                                                                                                                      |                                                           |                                                                          |                                                             |                                                      |                                                                          |                                                                      |                                                                                                                                                          |                                                   |                                                                                                                                                                                                                                                                                                                                                                                                                                                                                                                                                                                                                                                                                                                                                                                                                                                                                                                                                                                                                                                                                                                                                                                                                                                                                                                                                                                                                                                                                                                                                                                                                                                                                                                                                                                                                                                                                                                                                                                                                                                                                                                                                                                                                                                                                                                                                                                                                                                                                                                                                                                                                                                 |                                                                  |                                                                       |                                                                                                                                                                                                                                                                                                                                                                                                                                                                                                                                                                                                                                                                                                                                                                                                                                                                                                                                                                                                                                                                |                                                                                                                                                                                                                                                                                                                                                                                                                                                                                                                                                                                                                                                                                                                                                                                                                                                                                                                                                                                                                                                                                                                                                                                                                                                                                                                                                                                                                                                                                                                                                                                                                                                                                                                                                                                                                                                                                                                                                                                                                                                                                                                                                                                                                                                                                                                                                                                                                                                                                                                                                                                                                                                 |                        |                                                |                                                                                                                                                                                                                                                                                                                                                                                                                                                                                                                                                                                                                                                                                                                                                                                                                                                                                                                                                                                                                                                                |                                                |                                                 |                                                |                                                 |                                                |                                                 |                                                |                                                 |                                                |                                                 |                                                |                                                 |                                                                                                                                                                                                                                                                                                                                                                                                                                                                                                                                                                                                                                                                                                                                                                                                                                                                                                                                                                                                                                                                                                                                                                                              |                                                 |                                                |                                                 |                                                                                                                                                                                                                                                                                                                                                                                                                                                                                                                                                                                                                                                                                                                                                                                                                                                                                                                                                                                                                                                                                                                                                                                              |                                                 |                                              |                                                 |                                              |                                                 |                                              |                                                 |                                              |                                                 |                                              |                                                 |                                              |                                                 |                                              |                                                 |                                              |                                                 |                                              |                                                                                                                         |  |
| DAY 2 <input style="width: 50%;" type="text"/>                                                                                                                                                                                                                                                                                                                                                                                                                                                                                                                                                                                                                                                                                                                                                                                                                                                                                                                                                                                                                                                                                                                                                                                                                                                                                                                                                                                                                                                                                                                                                                                                                                                                                                                                                                                                                                                                                                                                                                                                                                                                                                                                                                                                                                                                                                                                                                                                                                                                                                                                                                                                                                                                                                                                                                                                                                                                                                                                                                                                                                                                                                                                                                                                                                                                                                                                                                                                                                                                                                                                                                                                                                                                                                                                                                                                                                                                                                                                                                                                                                                                                                                                                                                                                                                                                                                                  | <input style="width: 40%;" type="checkbox"/>                                         |                                                                          |                                                                       |                                                                                                                                                                                                                                                                                                                                                                                                                                                                                                                                                                                                                                                                                                                                                                                                                                                                                                                                                                                                                                                      |                                                           |                                                                          |                                                             |                                                      |                                                                          |                                                                      |                                                                                                                                                          |                                                   |                                                                                                                                                                                                                                                                                                                                                                                                                                                                                                                                                                                                                                                                                                                                                                                                                                                                                                                                                                                                                                                                                                                                                                                                                                                                                                                                                                                                                                                                                                                                                                                                                                                                                                                                                                                                                                                                                                                                                                                                                                                                                                                                                                                                                                                                                                                                                                                                                                                                                                                                                                                                                                                 |                                                                  |                                                                       |                                                                                                                                                                                                                                                                                                                                                                                                                                                                                                                                                                                                                                                                                                                                                                                                                                                                                                                                                                                                                                                                |                                                                                                                                                                                                                                                                                                                                                                                                                                                                                                                                                                                                                                                                                                                                                                                                                                                                                                                                                                                                                                                                                                                                                                                                                                                                                                                                                                                                                                                                                                                                                                                                                                                                                                                                                                                                                                                                                                                                                                                                                                                                                                                                                                                                                                                                                                                                                                                                                                                                                                                                                                                                                                                 |                        |                                                |                                                                                                                                                                                                                                                                                                                                                                                                                                                                                                                                                                                                                                                                                                                                                                                                                                                                                                                                                                                                                                                                |                                                |                                                 |                                                |                                                 |                                                |                                                 |                                                |                                                 |                                                |                                                 |                                                |                                                 |                                                                                                                                                                                                                                                                                                                                                                                                                                                                                                                                                                                                                                                                                                                                                                                                                                                                                                                                                                                                                                                                                                                                                                                              |                                                 |                                                |                                                 |                                                                                                                                                                                                                                                                                                                                                                                                                                                                                                                                                                                                                                                                                                                                                                                                                                                                                                                                                                                                                                                                                                                                                                                              |                                                 |                                              |                                                 |                                              |                                                 |                                              |                                                 |                                              |                                                 |                                              |                                                 |                                              |                                                 |                                              |                                                 |                                              |                                                 |                                              |                                                                                                                         |  |
| Date                                                                                                                                                                                                                                                                                                                                                                                                                                                                                                                                                                                                                                                                                                                                                                                                                                                                                                                                                                                                                                                                                                                                                                                                                                                                                                                                                                                                                                                                                                                                                                                                                                                                                                                                                                                                                                                                                                                                                                                                                                                                                                                                                                                                                                                                                                                                                                                                                                                                                                                                                                                                                                                                                                                                                                                                                                                                                                                                                                                                                                                                                                                                                                                                                                                                                                                                                                                                                                                                                                                                                                                                                                                                                                                                                                                                                                                                                                                                                                                                                                                                                                                                                                                                                                                                                                                                                                            | Checked when completed                                                               |                                                                          |                                                                       |                                                                                                                                                                                                                                                                                                                                                                                                                                                                                                                                                                                                                                                                                                                                                                                                                                                                                                                                                                                                                                                      |                                                           |                                                                          |                                                             |                                                      |                                                                          |                                                                      |                                                                                                                                                          |                                                   |                                                                                                                                                                                                                                                                                                                                                                                                                                                                                                                                                                                                                                                                                                                                                                                                                                                                                                                                                                                                                                                                                                                                                                                                                                                                                                                                                                                                                                                                                                                                                                                                                                                                                                                                                                                                                                                                                                                                                                                                                                                                                                                                                                                                                                                                                                                                                                                                                                                                                                                                                                                                                                                 |                                                                  |                                                                       |                                                                                                                                                                                                                                                                                                                                                                                                                                                                                                                                                                                                                                                                                                                                                                                                                                                                                                                                                                                                                                                                |                                                                                                                                                                                                                                                                                                                                                                                                                                                                                                                                                                                                                                                                                                                                                                                                                                                                                                                                                                                                                                                                                                                                                                                                                                                                                                                                                                                                                                                                                                                                                                                                                                                                                                                                                                                                                                                                                                                                                                                                                                                                                                                                                                                                                                                                                                                                                                                                                                                                                                                                                                                                                                                 |                        |                                                |                                                                                                                                                                                                                                                                                                                                                                                                                                                                                                                                                                                                                                                                                                                                                                                                                                                                                                                                                                                                                                                                |                                                |                                                 |                                                |                                                 |                                                |                                                 |                                                |                                                 |                                                |                                                 |                                                |                                                 |                                                                                                                                                                                                                                                                                                                                                                                                                                                                                                                                                                                                                                                                                                                                                                                                                                                                                                                                                                                                                                                                                                                                                                                              |                                                 |                                                |                                                 |                                                                                                                                                                                                                                                                                                                                                                                                                                                                                                                                                                                                                                                                                                                                                                                                                                                                                                                                                                                                                                                                                                                                                                                              |                                                 |                                              |                                                 |                                              |                                                 |                                              |                                                 |                                              |                                                 |                                              |                                                 |                                              |                                                 |                                              |                                                 |                                              |                                                 |                                              |                                                                                                                         |  |
| DAY 0 <input style="width: 50%;" type="text"/>                                                                                                                                                                                                                                                                                                                                                                                                                                                                                                                                                                                                                                                                                                                                                                                                                                                                                                                                                                                                                                                                                                                                                                                                                                                                                                                                                                                                                                                                                                                                                                                                                                                                                                                                                                                                                                                                                                                                                                                                                                                                                                                                                                                                                                                                                                                                                                                                                                                                                                                                                                                                                                                                                                                                                                                                                                                                                                                                                                                                                                                                                                                                                                                                                                                                                                                                                                                                                                                                                                                                                                                                                                                                                                                                                                                                                                                                                                                                                                                                                                                                                                                                                                                                                                                                                                                                  | <input style="width: 40%;" type="checkbox"/>                                         |                                                                          |                                                                       |                                                                                                                                                                                                                                                                                                                                                                                                                                                                                                                                                                                                                                                                                                                                                                                                                                                                                                                                                                                                                                                      |                                                           |                                                                          |                                                             |                                                      |                                                                          |                                                                      |                                                                                                                                                          |                                                   |                                                                                                                                                                                                                                                                                                                                                                                                                                                                                                                                                                                                                                                                                                                                                                                                                                                                                                                                                                                                                                                                                                                                                                                                                                                                                                                                                                                                                                                                                                                                                                                                                                                                                                                                                                                                                                                                                                                                                                                                                                                                                                                                                                                                                                                                                                                                                                                                                                                                                                                                                                                                                                                 |                                                                  |                                                                       |                                                                                                                                                                                                                                                                                                                                                                                                                                                                                                                                                                                                                                                                                                                                                                                                                                                                                                                                                                                                                                                                |                                                                                                                                                                                                                                                                                                                                                                                                                                                                                                                                                                                                                                                                                                                                                                                                                                                                                                                                                                                                                                                                                                                                                                                                                                                                                                                                                                                                                                                                                                                                                                                                                                                                                                                                                                                                                                                                                                                                                                                                                                                                                                                                                                                                                                                                                                                                                                                                                                                                                                                                                                                                                                                 |                        |                                                |                                                                                                                                                                                                                                                                                                                                                                                                                                                                                                                                                                                                                                                                                                                                                                                                                                                                                                                                                                                                                                                                |                                                |                                                 |                                                |                                                 |                                                |                                                 |                                                |                                                 |                                                |                                                 |                                                |                                                 |                                                                                                                                                                                                                                                                                                                                                                                                                                                                                                                                                                                                                                                                                                                                                                                                                                                                                                                                                                                                                                                                                                                                                                                              |                                                 |                                                |                                                 |                                                                                                                                                                                                                                                                                                                                                                                                                                                                                                                                                                                                                                                                                                                                                                                                                                                                                                                                                                                                                                                                                                                                                                                              |                                                 |                                              |                                                 |                                              |                                                 |                                              |                                                 |                                              |                                                 |                                              |                                                 |                                              |                                                 |                                              |                                                 |                                              |                                                 |                                              |                                                                                                                         |  |
| G6PD normal (7-day PQ)                                                                                                                                                                                                                                                                                                                                                                                                                                                                                                                                                                                                                                                                                                                                                                                                                                                                                                                                                                                                                                                                                                                                                                                                                                                                                                                                                                                                                                                                                                                                                                                                                                                                                                                                                                                                                                                                                                                                                                                                                                                                                                                                                                                                                                                                                                                                                                                                                                                                                                                                                                                                                                                                                                                                                                                                                                                                                                                                                                                                                                                                                                                                                                                                                                                                                                                                                                                                                                                                                                                                                                                                                                                                                                                                                                                                                                                                                                                                                                                                                                                                                                                                                                                                                                                                                                                                                          | G6PD intermediate & deficient (8week PQ)                                             |                                                                          |                                                                       |                                                                                                                                                                                                                                                                                                                                                                                                                                                                                                                                                                                                                                                                                                                                                                                                                                                                                                                                                                                                                                                      |                                                           |                                                                          |                                                             |                                                      |                                                                          |                                                                      |                                                                                                                                                          |                                                   |                                                                                                                                                                                                                                                                                                                                                                                                                                                                                                                                                                                                                                                                                                                                                                                                                                                                                                                                                                                                                                                                                                                                                                                                                                                                                                                                                                                                                                                                                                                                                                                                                                                                                                                                                                                                                                                                                                                                                                                                                                                                                                                                                                                                                                                                                                                                                                                                                                                                                                                                                                                                                                                 |                                                                  |                                                                       |                                                                                                                                                                                                                                                                                                                                                                                                                                                                                                                                                                                                                                                                                                                                                                                                                                                                                                                                                                                                                                                                |                                                                                                                                                                                                                                                                                                                                                                                                                                                                                                                                                                                                                                                                                                                                                                                                                                                                                                                                                                                                                                                                                                                                                                                                                                                                                                                                                                                                                                                                                                                                                                                                                                                                                                                                                                                                                                                                                                                                                                                                                                                                                                                                                                                                                                                                                                                                                                                                                                                                                                                                                                                                                                                 |                        |                                                |                                                                                                                                                                                                                                                                                                                                                                                                                                                                                                                                                                                                                                                                                                                                                                                                                                                                                                                                                                                                                                                                |                                                |                                                 |                                                |                                                 |                                                |                                                 |                                                |                                                 |                                                |                                                 |                                                |                                                 |                                                                                                                                                                                                                                                                                                                                                                                                                                                                                                                                                                                                                                                                                                                                                                                                                                                                                                                                                                                                                                                                                                                                                                                              |                                                 |                                                |                                                 |                                                                                                                                                                                                                                                                                                                                                                                                                                                                                                                                                                                                                                                                                                                                                                                                                                                                                                                                                                                                                                                                                                                                                                                              |                                                 |                                              |                                                 |                                              |                                                 |                                              |                                                 |                                              |                                                 |                                              |                                                 |                                              |                                                 |                                              |                                                 |                                              |                                                 |                                              |                                                                                                                         |  |
| <table style="width: 100%; border: none;"> <tr> <th style="text-align: left; font-size: small;">Date</th> <th style="text-align: left; font-size: small;">Checked when completed</th> </tr> <tr><td>DAY 0 <input style="width: 50%;" type="text"/></td><td><input style="width: 40%;" type="checkbox"/></td></tr> <tr><td>DAY 1 <input style="width: 50%;" type="text"/></td><td><input style="width: 40%;" type="checkbox"/></td></tr> <tr><td>DAY 2 <input style="width: 50%;" type="text"/></td><td><input style="width: 40%;" type="checkbox"/></td></tr> <tr><td>DAY 3 <input style="width: 50%;" type="text"/></td><td><input style="width: 40%;" type="checkbox"/></td></tr> <tr><td>DAY 4 <input style="width: 50%;" type="text"/></td><td><input style="width: 40%;" type="checkbox"/></td></tr> <tr><td>DAY 5 <input style="width: 50%;" type="text"/></td><td><input style="width: 40%;" type="checkbox"/></td></tr> <tr><td>DAY 6 <input style="width: 50%;" type="text"/></td><td><input style="width: 40%;" type="checkbox"/></td></tr> </table>                                                                                                                                                                                                                                                                                                                                                                                                                                                                                                                                                                                                                                                                                                                                                                                                                                                                                                                                                                                                                                                                                                                                                                                                                                                                                                                                                                                                                                                                                                                                                                                                                                                                                                                                                                                                                                                                                                                                                                                                                                                                                                                                                                                                                                                                                                                                                                                                                                                                                                                                                                                                                                                                                                                                                                                                                                                                                                                                                                                                                                                                                                                                                                                                                                                                                                                  | Date                                                                                 | Checked when completed                                                   | DAY 0 <input style="width: 50%;" type="text"/>                        | <input style="width: 40%;" type="checkbox"/>                                                                                                                                                                                                                                                                                                                                                                                                                                                                                                                                                                                                                                                                                                                                                                                                                                                                                                                                                                                                         | DAY 1 <input style="width: 50%;" type="text"/>            | <input style="width: 40%;" type="checkbox"/>                             | DAY 2 <input style="width: 50%;" type="text"/>              | <input style="width: 40%;" type="checkbox"/>         | DAY 3 <input style="width: 50%;" type="text"/>                           | <input style="width: 40%;" type="checkbox"/>                         | DAY 4 <input style="width: 50%;" type="text"/>                                                                                                           | <input style="width: 40%;" type="checkbox"/>      | DAY 5 <input style="width: 50%;" type="text"/>                                                                                                                                                                                                                                                                                                                                                                                                                                                                                                                                                                                                                                                                                                                                                                                                                                                                                                                                                                                                                                                                                                                                                                                                                                                                                                                                                                                                                                                                                                                                                                                                                                                                                                                                                                                                                                                                                                                                                                                                                                                                                                                                                                                                                                                                                                                                                                                                                                                                                                                                                                                                  | <input style="width: 40%;" type="checkbox"/>                     | DAY 6 <input style="width: 50%;" type="text"/>                        | <input style="width: 40%;" type="checkbox"/>                                                                                                                                                                                                                                                                                                                                                                                                                                                                                                                                                                                                                                                                                                                                                                                                                                                                                                                                                                                                                   | <table style="width: 100%; border: none;"> <tr> <th style="text-align: left; font-size: small;">Date</th> <th style="text-align: left; font-size: small;">Checked when completed</th> </tr> <tr><td>Week 1 <input style="width: 50%;" type="text"/></td><td><input style="width: 40%;" type="checkbox"/></td></tr> <tr><td>Week 2 <input style="width: 50%;" type="text"/></td><td><input style="width: 40%;" type="checkbox"/></td></tr> <tr><td>Week 3 <input style="width: 50%;" type="text"/></td><td><input style="width: 40%;" type="checkbox"/></td></tr> <tr><td>Week 4 <input style="width: 50%;" type="text"/></td><td><input style="width: 40%;" type="checkbox"/></td></tr> <tr><td>Week 5 <input style="width: 50%;" type="text"/></td><td><input style="width: 40%;" type="checkbox"/></td></tr> <tr><td>Week 6 <input style="width: 50%;" type="text"/></td><td><input style="width: 40%;" type="checkbox"/></td></tr> <tr><td>Week 7 <input style="width: 50%;" type="text"/></td><td><input style="width: 40%;" type="checkbox"/></td></tr> <tr><td>Week 8 <input style="width: 50%;" type="text"/></td><td><input style="width: 40%;" type="checkbox"/></td></tr> </table>                                                                                                                                                                                                                                                                                                                                                                                                                                                                                                                                                                                                                                                                                                                                                                                                                                                                                                                                                                                                                                                                                                                                                                                                                                                                                                                                                                                                                                                    | Date                   | Checked when completed                         | Week 1 <input style="width: 50%;" type="text"/>                                                                                                                                                                                                                                                                                                                                                                                                                                                                                                                                                                                                                                                                                                                                                                                                                                                                                                                                                                                                                | <input style="width: 40%;" type="checkbox"/>   | Week 2 <input style="width: 50%;" type="text"/> | <input style="width: 40%;" type="checkbox"/>   | Week 3 <input style="width: 50%;" type="text"/> | <input style="width: 40%;" type="checkbox"/>   | Week 4 <input style="width: 50%;" type="text"/> | <input style="width: 40%;" type="checkbox"/>   | Week 5 <input style="width: 50%;" type="text"/> | <input style="width: 40%;" type="checkbox"/>   | Week 6 <input style="width: 50%;" type="text"/> | <input style="width: 40%;" type="checkbox"/>   | Week 7 <input style="width: 50%;" type="text"/> | <input style="width: 40%;" type="checkbox"/>                                                                                                                                                                                                                                                                                                                                                                                                                                                                                                                                                                                                                                                                                                                                                                                                                                                                                                                                                                                                                                                                                                                                                 | Week 8 <input style="width: 50%;" type="text"/> | <input style="width: 40%;" type="checkbox"/>   |                                                 |                                                                                                                                                                                                                                                                                                                                                                                                                                                                                                                                                                                                                                                                                                                                                                                                                                                                                                                                                                                                                                                                                                                                                                                              |                                                 |                                              |                                                 |                                              |                                                 |                                              |                                                 |                                              |                                                 |                                              |                                                 |                                              |                                                 |                                              |                                                 |                                              |                                                 |                                              |                                                                                                                         |  |
| Date                                                                                                                                                                                                                                                                                                                                                                                                                                                                                                                                                                                                                                                                                                                                                                                                                                                                                                                                                                                                                                                                                                                                                                                                                                                                                                                                                                                                                                                                                                                                                                                                                                                                                                                                                                                                                                                                                                                                                                                                                                                                                                                                                                                                                                                                                                                                                                                                                                                                                                                                                                                                                                                                                                                                                                                                                                                                                                                                                                                                                                                                                                                                                                                                                                                                                                                                                                                                                                                                                                                                                                                                                                                                                                                                                                                                                                                                                                                                                                                                                                                                                                                                                                                                                                                                                                                                                                            | Checked when completed                                                               |                                                                          |                                                                       |                                                                                                                                                                                                                                                                                                                                                                                                                                                                                                                                                                                                                                                                                                                                                                                                                                                                                                                                                                                                                                                      |                                                           |                                                                          |                                                             |                                                      |                                                                          |                                                                      |                                                                                                                                                          |                                                   |                                                                                                                                                                                                                                                                                                                                                                                                                                                                                                                                                                                                                                                                                                                                                                                                                                                                                                                                                                                                                                                                                                                                                                                                                                                                                                                                                                                                                                                                                                                                                                                                                                                                                                                                                                                                                                                                                                                                                                                                                                                                                                                                                                                                                                                                                                                                                                                                                                                                                                                                                                                                                                                 |                                                                  |                                                                       |                                                                                                                                                                                                                                                                                                                                                                                                                                                                                                                                                                                                                                                                                                                                                                                                                                                                                                                                                                                                                                                                |                                                                                                                                                                                                                                                                                                                                                                                                                                                                                                                                                                                                                                                                                                                                                                                                                                                                                                                                                                                                                                                                                                                                                                                                                                                                                                                                                                                                                                                                                                                                                                                                                                                                                                                                                                                                                                                                                                                                                                                                                                                                                                                                                                                                                                                                                                                                                                                                                                                                                                                                                                                                                                                 |                        |                                                |                                                                                                                                                                                                                                                                                                                                                                                                                                                                                                                                                                                                                                                                                                                                                                                                                                                                                                                                                                                                                                                                |                                                |                                                 |                                                |                                                 |                                                |                                                 |                                                |                                                 |                                                |                                                 |                                                |                                                 |                                                                                                                                                                                                                                                                                                                                                                                                                                                                                                                                                                                                                                                                                                                                                                                                                                                                                                                                                                                                                                                                                                                                                                                              |                                                 |                                                |                                                 |                                                                                                                                                                                                                                                                                                                                                                                                                                                                                                                                                                                                                                                                                                                                                                                                                                                                                                                                                                                                                                                                                                                                                                                              |                                                 |                                              |                                                 |                                              |                                                 |                                              |                                                 |                                              |                                                 |                                              |                                                 |                                              |                                                 |                                              |                                                 |                                              |                                                 |                                              |                                                                                                                         |  |
| DAY 0 <input style="width: 50%;" type="text"/>                                                                                                                                                                                                                                                                                                                                                                                                                                                                                                                                                                                                                                                                                                                                                                                                                                                                                                                                                                                                                                                                                                                                                                                                                                                                                                                                                                                                                                                                                                                                                                                                                                                                                                                                                                                                                                                                                                                                                                                                                                                                                                                                                                                                                                                                                                                                                                                                                                                                                                                                                                                                                                                                                                                                                                                                                                                                                                                                                                                                                                                                                                                                                                                                                                                                                                                                                                                                                                                                                                                                                                                                                                                                                                                                                                                                                                                                                                                                                                                                                                                                                                                                                                                                                                                                                                                                  | <input style="width: 40%;" type="checkbox"/>                                         |                                                                          |                                                                       |                                                                                                                                                                                                                                                                                                                                                                                                                                                                                                                                                                                                                                                                                                                                                                                                                                                                                                                                                                                                                                                      |                                                           |                                                                          |                                                             |                                                      |                                                                          |                                                                      |                                                                                                                                                          |                                                   |                                                                                                                                                                                                                                                                                                                                                                                                                                                                                                                                                                                                                                                                                                                                                                                                                                                                                                                                                                                                                                                                                                                                                                                                                                                                                                                                                                                                                                                                                                                                                                                                                                                                                                                                                                                                                                                                                                                                                                                                                                                                                                                                                                                                                                                                                                                                                                                                                                                                                                                                                                                                                                                 |                                                                  |                                                                       |                                                                                                                                                                                                                                                                                                                                                                                                                                                                                                                                                                                                                                                                                                                                                                                                                                                                                                                                                                                                                                                                |                                                                                                                                                                                                                                                                                                                                                                                                                                                                                                                                                                                                                                                                                                                                                                                                                                                                                                                                                                                                                                                                                                                                                                                                                                                                                                                                                                                                                                                                                                                                                                                                                                                                                                                                                                                                                                                                                                                                                                                                                                                                                                                                                                                                                                                                                                                                                                                                                                                                                                                                                                                                                                                 |                        |                                                |                                                                                                                                                                                                                                                                                                                                                                                                                                                                                                                                                                                                                                                                                                                                                                                                                                                                                                                                                                                                                                                                |                                                |                                                 |                                                |                                                 |                                                |                                                 |                                                |                                                 |                                                |                                                 |                                                |                                                 |                                                                                                                                                                                                                                                                                                                                                                                                                                                                                                                                                                                                                                                                                                                                                                                                                                                                                                                                                                                                                                                                                                                                                                                              |                                                 |                                                |                                                 |                                                                                                                                                                                                                                                                                                                                                                                                                                                                                                                                                                                                                                                                                                                                                                                                                                                                                                                                                                                                                                                                                                                                                                                              |                                                 |                                              |                                                 |                                              |                                                 |                                              |                                                 |                                              |                                                 |                                              |                                                 |                                              |                                                 |                                              |                                                 |                                              |                                                 |                                              |                                                                                                                         |  |
| DAY 1 <input style="width: 50%;" type="text"/>                                                                                                                                                                                                                                                                                                                                                                                                                                                                                                                                                                                                                                                                                                                                                                                                                                                                                                                                                                                                                                                                                                                                                                                                                                                                                                                                                                                                                                                                                                                                                                                                                                                                                                                                                                                                                                                                                                                                                                                                                                                                                                                                                                                                                                                                                                                                                                                                                                                                                                                                                                                                                                                                                                                                                                                                                                                                                                                                                                                                                                                                                                                                                                                                                                                                                                                                                                                                                                                                                                                                                                                                                                                                                                                                                                                                                                                                                                                                                                                                                                                                                                                                                                                                                                                                                                                                  | <input style="width: 40%;" type="checkbox"/>                                         |                                                                          |                                                                       |                                                                                                                                                                                                                                                                                                                                                                                                                                                                                                                                                                                                                                                                                                                                                                                                                                                                                                                                                                                                                                                      |                                                           |                                                                          |                                                             |                                                      |                                                                          |                                                                      |                                                                                                                                                          |                                                   |                                                                                                                                                                                                                                                                                                                                                                                                                                                                                                                                                                                                                                                                                                                                                                                                                                                                                                                                                                                                                                                                                                                                                                                                                                                                                                                                                                                                                                                                                                                                                                                                                                                                                                                                                                                                                                                                                                                                                                                                                                                                                                                                                                                                                                                                                                                                                                                                                                                                                                                                                                                                                                                 |                                                                  |                                                                       |                                                                                                                                                                                                                                                                                                                                                                                                                                                                                                                                                                                                                                                                                                                                                                                                                                                                                                                                                                                                                                                                |                                                                                                                                                                                                                                                                                                                                                                                                                                                                                                                                                                                                                                                                                                                                                                                                                                                                                                                                                                                                                                                                                                                                                                                                                                                                                                                                                                                                                                                                                                                                                                                                                                                                                                                                                                                                                                                                                                                                                                                                                                                                                                                                                                                                                                                                                                                                                                                                                                                                                                                                                                                                                                                 |                        |                                                |                                                                                                                                                                                                                                                                                                                                                                                                                                                                                                                                                                                                                                                                                                                                                                                                                                                                                                                                                                                                                                                                |                                                |                                                 |                                                |                                                 |                                                |                                                 |                                                |                                                 |                                                |                                                 |                                                |                                                 |                                                                                                                                                                                                                                                                                                                                                                                                                                                                                                                                                                                                                                                                                                                                                                                                                                                                                                                                                                                                                                                                                                                                                                                              |                                                 |                                                |                                                 |                                                                                                                                                                                                                                                                                                                                                                                                                                                                                                                                                                                                                                                                                                                                                                                                                                                                                                                                                                                                                                                                                                                                                                                              |                                                 |                                              |                                                 |                                              |                                                 |                                              |                                                 |                                              |                                                 |                                              |                                                 |                                              |                                                 |                                              |                                                 |                                              |                                                 |                                              |                                                                                                                         |  |
| DAY 2 <input style="width: 50%;" type="text"/>                                                                                                                                                                                                                                                                                                                                                                                                                                                                                                                                                                                                                                                                                                                                                                                                                                                                                                                                                                                                                                                                                                                                                                                                                                                                                                                                                                                                                                                                                                                                                                                                                                                                                                                                                                                                                                                                                                                                                                                                                                                                                                                                                                                                                                                                                                                                                                                                                                                                                                                                                                                                                                                                                                                                                                                                                                                                                                                                                                                                                                                                                                                                                                                                                                                                                                                                                                                                                                                                                                                                                                                                                                                                                                                                                                                                                                                                                                                                                                                                                                                                                                                                                                                                                                                                                                                                  | <input style="width: 40%;" type="checkbox"/>                                         |                                                                          |                                                                       |                                                                                                                                                                                                                                                                                                                                                                                                                                                                                                                                                                                                                                                                                                                                                                                                                                                                                                                                                                                                                                                      |                                                           |                                                                          |                                                             |                                                      |                                                                          |                                                                      |                                                                                                                                                          |                                                   |                                                                                                                                                                                                                                                                                                                                                                                                                                                                                                                                                                                                                                                                                                                                                                                                                                                                                                                                                                                                                                                                                                                                                                                                                                                                                                                                                                                                                                                                                                                                                                                                                                                                                                                                                                                                                                                                                                                                                                                                                                                                                                                                                                                                                                                                                                                                                                                                                                                                                                                                                                                                                                                 |                                                                  |                                                                       |                                                                                                                                                                                                                                                                                                                                                                                                                                                                                                                                                                                                                                                                                                                                                                                                                                                                                                                                                                                                                                                                |                                                                                                                                                                                                                                                                                                                                                                                                                                                                                                                                                                                                                                                                                                                                                                                                                                                                                                                                                                                                                                                                                                                                                                                                                                                                                                                                                                                                                                                                                                                                                                                                                                                                                                                                                                                                                                                                                                                                                                                                                                                                                                                                                                                                                                                                                                                                                                                                                                                                                                                                                                                                                                                 |                        |                                                |                                                                                                                                                                                                                                                                                                                                                                                                                                                                                                                                                                                                                                                                                                                                                                                                                                                                                                                                                                                                                                                                |                                                |                                                 |                                                |                                                 |                                                |                                                 |                                                |                                                 |                                                |                                                 |                                                |                                                 |                                                                                                                                                                                                                                                                                                                                                                                                                                                                                                                                                                                                                                                                                                                                                                                                                                                                                                                                                                                                                                                                                                                                                                                              |                                                 |                                                |                                                 |                                                                                                                                                                                                                                                                                                                                                                                                                                                                                                                                                                                                                                                                                                                                                                                                                                                                                                                                                                                                                                                                                                                                                                                              |                                                 |                                              |                                                 |                                              |                                                 |                                              |                                                 |                                              |                                                 |                                              |                                                 |                                              |                                                 |                                              |                                                 |                                              |                                                 |                                              |                                                                                                                         |  |
| DAY 3 <input style="width: 50%;" type="text"/>                                                                                                                                                                                                                                                                                                                                                                                                                                                                                                                                                                                                                                                                                                                                                                                                                                                                                                                                                                                                                                                                                                                                                                                                                                                                                                                                                                                                                                                                                                                                                                                                                                                                                                                                                                                                                                                                                                                                                                                                                                                                                                                                                                                                                                                                                                                                                                                                                                                                                                                                                                                                                                                                                                                                                                                                                                                                                                                                                                                                                                                                                                                                                                                                                                                                                                                                                                                                                                                                                                                                                                                                                                                                                                                                                                                                                                                                                                                                                                                                                                                                                                                                                                                                                                                                                                                                  | <input style="width: 40%;" type="checkbox"/>                                         |                                                                          |                                                                       |                                                                                                                                                                                                                                                                                                                                                                                                                                                                                                                                                                                                                                                                                                                                                                                                                                                                                                                                                                                                                                                      |                                                           |                                                                          |                                                             |                                                      |                                                                          |                                                                      |                                                                                                                                                          |                                                   |                                                                                                                                                                                                                                                                                                                                                                                                                                                                                                                                                                                                                                                                                                                                                                                                                                                                                                                                                                                                                                                                                                                                                                                                                                                                                                                                                                                                                                                                                                                                                                                                                                                                                                                                                                                                                                                                                                                                                                                                                                                                                                                                                                                                                                                                                                                                                                                                                                                                                                                                                                                                                                                 |                                                                  |                                                                       |                                                                                                                                                                                                                                                                                                                                                                                                                                                                                                                                                                                                                                                                                                                                                                                                                                                                                                                                                                                                                                                                |                                                                                                                                                                                                                                                                                                                                                                                                                                                                                                                                                                                                                                                                                                                                                                                                                                                                                                                                                                                                                                                                                                                                                                                                                                                                                                                                                                                                                                                                                                                                                                                                                                                                                                                                                                                                                                                                                                                                                                                                                                                                                                                                                                                                                                                                                                                                                                                                                                                                                                                                                                                                                                                 |                        |                                                |                                                                                                                                                                                                                                                                                                                                                                                                                                                                                                                                                                                                                                                                                                                                                                                                                                                                                                                                                                                                                                                                |                                                |                                                 |                                                |                                                 |                                                |                                                 |                                                |                                                 |                                                |                                                 |                                                |                                                 |                                                                                                                                                                                                                                                                                                                                                                                                                                                                                                                                                                                                                                                                                                                                                                                                                                                                                                                                                                                                                                                                                                                                                                                              |                                                 |                                                |                                                 |                                                                                                                                                                                                                                                                                                                                                                                                                                                                                                                                                                                                                                                                                                                                                                                                                                                                                                                                                                                                                                                                                                                                                                                              |                                                 |                                              |                                                 |                                              |                                                 |                                              |                                                 |                                              |                                                 |                                              |                                                 |                                              |                                                 |                                              |                                                 |                                              |                                                 |                                              |                                                                                                                         |  |
| DAY 4 <input style="width: 50%;" type="text"/>                                                                                                                                                                                                                                                                                                                                                                                                                                                                                                                                                                                                                                                                                                                                                                                                                                                                                                                                                                                                                                                                                                                                                                                                                                                                                                                                                                                                                                                                                                                                                                                                                                                                                                                                                                                                                                                                                                                                                                                                                                                                                                                                                                                                                                                                                                                                                                                                                                                                                                                                                                                                                                                                                                                                                                                                                                                                                                                                                                                                                                                                                                                                                                                                                                                                                                                                                                                                                                                                                                                                                                                                                                                                                                                                                                                                                                                                                                                                                                                                                                                                                                                                                                                                                                                                                                                                  | <input style="width: 40%;" type="checkbox"/>                                         |                                                                          |                                                                       |                                                                                                                                                                                                                                                                                                                                                                                                                                                                                                                                                                                                                                                                                                                                                                                                                                                                                                                                                                                                                                                      |                                                           |                                                                          |                                                             |                                                      |                                                                          |                                                                      |                                                                                                                                                          |                                                   |                                                                                                                                                                                                                                                                                                                                                                                                                                                                                                                                                                                                                                                                                                                                                                                                                                                                                                                                                                                                                                                                                                                                                                                                                                                                                                                                                                                                                                                                                                                                                                                                                                                                                                                                                                                                                                                                                                                                                                                                                                                                                                                                                                                                                                                                                                                                                                                                                                                                                                                                                                                                                                                 |                                                                  |                                                                       |                                                                                                                                                                                                                                                                                                                                                                                                                                                                                                                                                                                                                                                                                                                                                                                                                                                                                                                                                                                                                                                                |                                                                                                                                                                                                                                                                                                                                                                                                                                                                                                                                                                                                                                                                                                                                                                                                                                                                                                                                                                                                                                                                                                                                                                                                                                                                                                                                                                                                                                                                                                                                                                                                                                                                                                                                                                                                                                                                                                                                                                                                                                                                                                                                                                                                                                                                                                                                                                                                                                                                                                                                                                                                                                                 |                        |                                                |                                                                                                                                                                                                                                                                                                                                                                                                                                                                                                                                                                                                                                                                                                                                                                                                                                                                                                                                                                                                                                                                |                                                |                                                 |                                                |                                                 |                                                |                                                 |                                                |                                                 |                                                |                                                 |                                                |                                                 |                                                                                                                                                                                                                                                                                                                                                                                                                                                                                                                                                                                                                                                                                                                                                                                                                                                                                                                                                                                                                                                                                                                                                                                              |                                                 |                                                |                                                 |                                                                                                                                                                                                                                                                                                                                                                                                                                                                                                                                                                                                                                                                                                                                                                                                                                                                                                                                                                                                                                                                                                                                                                                              |                                                 |                                              |                                                 |                                              |                                                 |                                              |                                                 |                                              |                                                 |                                              |                                                 |                                              |                                                 |                                              |                                                 |                                              |                                                 |                                              |                                                                                                                         |  |
| DAY 5 <input style="width: 50%;" type="text"/>                                                                                                                                                                                                                                                                                                                                                                                                                                                                                                                                                                                                                                                                                                                                                                                                                                                                                                                                                                                                                                                                                                                                                                                                                                                                                                                                                                                                                                                                                                                                                                                                                                                                                                                                                                                                                                                                                                                                                                                                                                                                                                                                                                                                                                                                                                                                                                                                                                                                                                                                                                                                                                                                                                                                                                                                                                                                                                                                                                                                                                                                                                                                                                                                                                                                                                                                                                                                                                                                                                                                                                                                                                                                                                                                                                                                                                                                                                                                                                                                                                                                                                                                                                                                                                                                                                                                  | <input style="width: 40%;" type="checkbox"/>                                         |                                                                          |                                                                       |                                                                                                                                                                                                                                                                                                                                                                                                                                                                                                                                                                                                                                                                                                                                                                                                                                                                                                                                                                                                                                                      |                                                           |                                                                          |                                                             |                                                      |                                                                          |                                                                      |                                                                                                                                                          |                                                   |                                                                                                                                                                                                                                                                                                                                                                                                                                                                                                                                                                                                                                                                                                                                                                                                                                                                                                                                                                                                                                                                                                                                                                                                                                                                                                                                                                                                                                                                                                                                                                                                                                                                                                                                                                                                                                                                                                                                                                                                                                                                                                                                                                                                                                                                                                                                                                                                                                                                                                                                                                                                                                                 |                                                                  |                                                                       |                                                                                                                                                                                                                                                                                                                                                                                                                                                                                                                                                                                                                                                                                                                                                                                                                                                                                                                                                                                                                                                                |                                                                                                                                                                                                                                                                                                                                                                                                                                                                                                                                                                                                                                                                                                                                                                                                                                                                                                                                                                                                                                                                                                                                                                                                                                                                                                                                                                                                                                                                                                                                                                                                                                                                                                                                                                                                                                                                                                                                                                                                                                                                                                                                                                                                                                                                                                                                                                                                                                                                                                                                                                                                                                                 |                        |                                                |                                                                                                                                                                                                                                                                                                                                                                                                                                                                                                                                                                                                                                                                                                                                                                                                                                                                                                                                                                                                                                                                |                                                |                                                 |                                                |                                                 |                                                |                                                 |                                                |                                                 |                                                |                                                 |                                                |                                                 |                                                                                                                                                                                                                                                                                                                                                                                                                                                                                                                                                                                                                                                                                                                                                                                                                                                                                                                                                                                                                                                                                                                                                                                              |                                                 |                                                |                                                 |                                                                                                                                                                                                                                                                                                                                                                                                                                                                                                                                                                                                                                                                                                                                                                                                                                                                                                                                                                                                                                                                                                                                                                                              |                                                 |                                              |                                                 |                                              |                                                 |                                              |                                                 |                                              |                                                 |                                              |                                                 |                                              |                                                 |                                              |                                                 |                                              |                                                 |                                              |                                                                                                                         |  |
| DAY 6 <input style="width: 50%;" type="text"/>                                                                                                                                                                                                                                                                                                                                                                                                                                                                                                                                                                                                                                                                                                                                                                                                                                                                                                                                                                                                                                                                                                                                                                                                                                                                                                                                                                                                                                                                                                                                                                                                                                                                                                                                                                                                                                                                                                                                                                                                                                                                                                                                                                                                                                                                                                                                                                                                                                                                                                                                                                                                                                                                                                                                                                                                                                                                                                                                                                                                                                                                                                                                                                                                                                                                                                                                                                                                                                                                                                                                                                                                                                                                                                                                                                                                                                                                                                                                                                                                                                                                                                                                                                                                                                                                                                                                  | <input style="width: 40%;" type="checkbox"/>                                         |                                                                          |                                                                       |                                                                                                                                                                                                                                                                                                                                                                                                                                                                                                                                                                                                                                                                                                                                                                                                                                                                                                                                                                                                                                                      |                                                           |                                                                          |                                                             |                                                      |                                                                          |                                                                      |                                                                                                                                                          |                                                   |                                                                                                                                                                                                                                                                                                                                                                                                                                                                                                                                                                                                                                                                                                                                                                                                                                                                                                                                                                                                                                                                                                                                                                                                                                                                                                                                                                                                                                                                                                                                                                                                                                                                                                                                                                                                                                                                                                                                                                                                                                                                                                                                                                                                                                                                                                                                                                                                                                                                                                                                                                                                                                                 |                                                                  |                                                                       |                                                                                                                                                                                                                                                                                                                                                                                                                                                                                                                                                                                                                                                                                                                                                                                                                                                                                                                                                                                                                                                                |                                                                                                                                                                                                                                                                                                                                                                                                                                                                                                                                                                                                                                                                                                                                                                                                                                                                                                                                                                                                                                                                                                                                                                                                                                                                                                                                                                                                                                                                                                                                                                                                                                                                                                                                                                                                                                                                                                                                                                                                                                                                                                                                                                                                                                                                                                                                                                                                                                                                                                                                                                                                                                                 |                        |                                                |                                                                                                                                                                                                                                                                                                                                                                                                                                                                                                                                                                                                                                                                                                                                                                                                                                                                                                                                                                                                                                                                |                                                |                                                 |                                                |                                                 |                                                |                                                 |                                                |                                                 |                                                |                                                 |                                                |                                                 |                                                                                                                                                                                                                                                                                                                                                                                                                                                                                                                                                                                                                                                                                                                                                                                                                                                                                                                                                                                                                                                                                                                                                                                              |                                                 |                                                |                                                 |                                                                                                                                                                                                                                                                                                                                                                                                                                                                                                                                                                                                                                                                                                                                                                                                                                                                                                                                                                                                                                                                                                                                                                                              |                                                 |                                              |                                                 |                                              |                                                 |                                              |                                                 |                                              |                                                 |                                              |                                                 |                                              |                                                 |                                              |                                                 |                                              |                                                 |                                              |                                                                                                                         |  |
| Date                                                                                                                                                                                                                                                                                                                                                                                                                                                                                                                                                                                                                                                                                                                                                                                                                                                                                                                                                                                                                                                                                                                                                                                                                                                                                                                                                                                                                                                                                                                                                                                                                                                                                                                                                                                                                                                                                                                                                                                                                                                                                                                                                                                                                                                                                                                                                                                                                                                                                                                                                                                                                                                                                                                                                                                                                                                                                                                                                                                                                                                                                                                                                                                                                                                                                                                                                                                                                                                                                                                                                                                                                                                                                                                                                                                                                                                                                                                                                                                                                                                                                                                                                                                                                                                                                                                                                                            | Checked when completed                                                               |                                                                          |                                                                       |                                                                                                                                                                                                                                                                                                                                                                                                                                                                                                                                                                                                                                                                                                                                                                                                                                                                                                                                                                                                                                                      |                                                           |                                                                          |                                                             |                                                      |                                                                          |                                                                      |                                                                                                                                                          |                                                   |                                                                                                                                                                                                                                                                                                                                                                                                                                                                                                                                                                                                                                                                                                                                                                                                                                                                                                                                                                                                                                                                                                                                                                                                                                                                                                                                                                                                                                                                                                                                                                                                                                                                                                                                                                                                                                                                                                                                                                                                                                                                                                                                                                                                                                                                                                                                                                                                                                                                                                                                                                                                                                                 |                                                                  |                                                                       |                                                                                                                                                                                                                                                                                                                                                                                                                                                                                                                                                                                                                                                                                                                                                                                                                                                                                                                                                                                                                                                                |                                                                                                                                                                                                                                                                                                                                                                                                                                                                                                                                                                                                                                                                                                                                                                                                                                                                                                                                                                                                                                                                                                                                                                                                                                                                                                                                                                                                                                                                                                                                                                                                                                                                                                                                                                                                                                                                                                                                                                                                                                                                                                                                                                                                                                                                                                                                                                                                                                                                                                                                                                                                                                                 |                        |                                                |                                                                                                                                                                                                                                                                                                                                                                                                                                                                                                                                                                                                                                                                                                                                                                                                                                                                                                                                                                                                                                                                |                                                |                                                 |                                                |                                                 |                                                |                                                 |                                                |                                                 |                                                |                                                 |                                                |                                                 |                                                                                                                                                                                                                                                                                                                                                                                                                                                                                                                                                                                                                                                                                                                                                                                                                                                                                                                                                                                                                                                                                                                                                                                              |                                                 |                                                |                                                 |                                                                                                                                                                                                                                                                                                                                                                                                                                                                                                                                                                                                                                                                                                                                                                                                                                                                                                                                                                                                                                                                                                                                                                                              |                                                 |                                              |                                                 |                                              |                                                 |                                              |                                                 |                                              |                                                 |                                              |                                                 |                                              |                                                 |                                              |                                                 |                                              |                                                 |                                              |                                                                                                                         |  |
| Week 1 <input style="width: 50%;" type="text"/>                                                                                                                                                                                                                                                                                                                                                                                                                                                                                                                                                                                                                                                                                                                                                                                                                                                                                                                                                                                                                                                                                                                                                                                                                                                                                                                                                                                                                                                                                                                                                                                                                                                                                                                                                                                                                                                                                                                                                                                                                                                                                                                                                                                                                                                                                                                                                                                                                                                                                                                                                                                                                                                                                                                                                                                                                                                                                                                                                                                                                                                                                                                                                                                                                                                                                                                                                                                                                                                                                                                                                                                                                                                                                                                                                                                                                                                                                                                                                                                                                                                                                                                                                                                                                                                                                                                                 | <input style="width: 40%;" type="checkbox"/>                                         |                                                                          |                                                                       |                                                                                                                                                                                                                                                                                                                                                                                                                                                                                                                                                                                                                                                                                                                                                                                                                                                                                                                                                                                                                                                      |                                                           |                                                                          |                                                             |                                                      |                                                                          |                                                                      |                                                                                                                                                          |                                                   |                                                                                                                                                                                                                                                                                                                                                                                                                                                                                                                                                                                                                                                                                                                                                                                                                                                                                                                                                                                                                                                                                                                                                                                                                                                                                                                                                                                                                                                                                                                                                                                                                                                                                                                                                                                                                                                                                                                                                                                                                                                                                                                                                                                                                                                                                                                                                                                                                                                                                                                                                                                                                                                 |                                                                  |                                                                       |                                                                                                                                                                                                                                                                                                                                                                                                                                                                                                                                                                                                                                                                                                                                                                                                                                                                                                                                                                                                                                                                |                                                                                                                                                                                                                                                                                                                                                                                                                                                                                                                                                                                                                                                                                                                                                                                                                                                                                                                                                                                                                                                                                                                                                                                                                                                                                                                                                                                                                                                                                                                                                                                                                                                                                                                                                                                                                                                                                                                                                                                                                                                                                                                                                                                                                                                                                                                                                                                                                                                                                                                                                                                                                                                 |                        |                                                |                                                                                                                                                                                                                                                                                                                                                                                                                                                                                                                                                                                                                                                                                                                                                                                                                                                                                                                                                                                                                                                                |                                                |                                                 |                                                |                                                 |                                                |                                                 |                                                |                                                 |                                                |                                                 |                                                |                                                 |                                                                                                                                                                                                                                                                                                                                                                                                                                                                                                                                                                                                                                                                                                                                                                                                                                                                                                                                                                                                                                                                                                                                                                                              |                                                 |                                                |                                                 |                                                                                                                                                                                                                                                                                                                                                                                                                                                                                                                                                                                                                                                                                                                                                                                                                                                                                                                                                                                                                                                                                                                                                                                              |                                                 |                                              |                                                 |                                              |                                                 |                                              |                                                 |                                              |                                                 |                                              |                                                 |                                              |                                                 |                                              |                                                 |                                              |                                                 |                                              |                                                                                                                         |  |
| Week 2 <input style="width: 50%;" type="text"/>                                                                                                                                                                                                                                                                                                                                                                                                                                                                                                                                                                                                                                                                                                                                                                                                                                                                                                                                                                                                                                                                                                                                                                                                                                                                                                                                                                                                                                                                                                                                                                                                                                                                                                                                                                                                                                                                                                                                                                                                                                                                                                                                                                                                                                                                                                                                                                                                                                                                                                                                                                                                                                                                                                                                                                                                                                                                                                                                                                                                                                                                                                                                                                                                                                                                                                                                                                                                                                                                                                                                                                                                                                                                                                                                                                                                                                                                                                                                                                                                                                                                                                                                                                                                                                                                                                                                 | <input style="width: 40%;" type="checkbox"/>                                         |                                                                          |                                                                       |                                                                                                                                                                                                                                                                                                                                                                                                                                                                                                                                                                                                                                                                                                                                                                                                                                                                                                                                                                                                                                                      |                                                           |                                                                          |                                                             |                                                      |                                                                          |                                                                      |                                                                                                                                                          |                                                   |                                                                                                                                                                                                                                                                                                                                                                                                                                                                                                                                                                                                                                                                                                                                                                                                                                                                                                                                                                                                                                                                                                                                                                                                                                                                                                                                                                                                                                                                                                                                                                                                                                                                                                                                                                                                                                                                                                                                                                                                                                                                                                                                                                                                                                                                                                                                                                                                                                                                                                                                                                                                                                                 |                                                                  |                                                                       |                                                                                                                                                                                                                                                                                                                                                                                                                                                                                                                                                                                                                                                                                                                                                                                                                                                                                                                                                                                                                                                                |                                                                                                                                                                                                                                                                                                                                                                                                                                                                                                                                                                                                                                                                                                                                                                                                                                                                                                                                                                                                                                                                                                                                                                                                                                                                                                                                                                                                                                                                                                                                                                                                                                                                                                                                                                                                                                                                                                                                                                                                                                                                                                                                                                                                                                                                                                                                                                                                                                                                                                                                                                                                                                                 |                        |                                                |                                                                                                                                                                                                                                                                                                                                                                                                                                                                                                                                                                                                                                                                                                                                                                                                                                                                                                                                                                                                                                                                |                                                |                                                 |                                                |                                                 |                                                |                                                 |                                                |                                                 |                                                |                                                 |                                                |                                                 |                                                                                                                                                                                                                                                                                                                                                                                                                                                                                                                                                                                                                                                                                                                                                                                                                                                                                                                                                                                                                                                                                                                                                                                              |                                                 |                                                |                                                 |                                                                                                                                                                                                                                                                                                                                                                                                                                                                                                                                                                                                                                                                                                                                                                                                                                                                                                                                                                                                                                                                                                                                                                                              |                                                 |                                              |                                                 |                                              |                                                 |                                              |                                                 |                                              |                                                 |                                              |                                                 |                                              |                                                 |                                              |                                                 |                                              |                                                 |                                              |                                                                                                                         |  |
| Week 3 <input style="width: 50%;" type="text"/>                                                                                                                                                                                                                                                                                                                                                                                                                                                                                                                                                                                                                                                                                                                                                                                                                                                                                                                                                                                                                                                                                                                                                                                                                                                                                                                                                                                                                                                                                                                                                                                                                                                                                                                                                                                                                                                                                                                                                                                                                                                                                                                                                                                                                                                                                                                                                                                                                                                                                                                                                                                                                                                                                                                                                                                                                                                                                                                                                                                                                                                                                                                                                                                                                                                                                                                                                                                                                                                                                                                                                                                                                                                                                                                                                                                                                                                                                                                                                                                                                                                                                                                                                                                                                                                                                                                                 | <input style="width: 40%;" type="checkbox"/>                                         |                                                                          |                                                                       |                                                                                                                                                                                                                                                                                                                                                                                                                                                                                                                                                                                                                                                                                                                                                                                                                                                                                                                                                                                                                                                      |                                                           |                                                                          |                                                             |                                                      |                                                                          |                                                                      |                                                                                                                                                          |                                                   |                                                                                                                                                                                                                                                                                                                                                                                                                                                                                                                                                                                                                                                                                                                                                                                                                                                                                                                                                                                                                                                                                                                                                                                                                                                                                                                                                                                                                                                                                                                                                                                                                                                                                                                                                                                                                                                                                                                                                                                                                                                                                                                                                                                                                                                                                                                                                                                                                                                                                                                                                                                                                                                 |                                                                  |                                                                       |                                                                                                                                                                                                                                                                                                                                                                                                                                                                                                                                                                                                                                                                                                                                                                                                                                                                                                                                                                                                                                                                |                                                                                                                                                                                                                                                                                                                                                                                                                                                                                                                                                                                                                                                                                                                                                                                                                                                                                                                                                                                                                                                                                                                                                                                                                                                                                                                                                                                                                                                                                                                                                                                                                                                                                                                                                                                                                                                                                                                                                                                                                                                                                                                                                                                                                                                                                                                                                                                                                                                                                                                                                                                                                                                 |                        |                                                |                                                                                                                                                                                                                                                                                                                                                                                                                                                                                                                                                                                                                                                                                                                                                                                                                                                                                                                                                                                                                                                                |                                                |                                                 |                                                |                                                 |                                                |                                                 |                                                |                                                 |                                                |                                                 |                                                |                                                 |                                                                                                                                                                                                                                                                                                                                                                                                                                                                                                                                                                                                                                                                                                                                                                                                                                                                                                                                                                                                                                                                                                                                                                                              |                                                 |                                                |                                                 |                                                                                                                                                                                                                                                                                                                                                                                                                                                                                                                                                                                                                                                                                                                                                                                                                                                                                                                                                                                                                                                                                                                                                                                              |                                                 |                                              |                                                 |                                              |                                                 |                                              |                                                 |                                              |                                                 |                                              |                                                 |                                              |                                                 |                                              |                                                 |                                              |                                                 |                                              |                                                                                                                         |  |
| Week 4 <input style="width: 50%;" type="text"/>                                                                                                                                                                                                                                                                                                                                                                                                                                                                                                                                                                                                                                                                                                                                                                                                                                                                                                                                                                                                                                                                                                                                                                                                                                                                                                                                                                                                                                                                                                                                                                                                                                                                                                                                                                                                                                                                                                                                                                                                                                                                                                                                                                                                                                                                                                                                                                                                                                                                                                                                                                                                                                                                                                                                                                                                                                                                                                                                                                                                                                                                                                                                                                                                                                                                                                                                                                                                                                                                                                                                                                                                                                                                                                                                                                                                                                                                                                                                                                                                                                                                                                                                                                                                                                                                                                                                 | <input style="width: 40%;" type="checkbox"/>                                         |                                                                          |                                                                       |                                                                                                                                                                                                                                                                                                                                                                                                                                                                                                                                                                                                                                                                                                                                                                                                                                                                                                                                                                                                                                                      |                                                           |                                                                          |                                                             |                                                      |                                                                          |                                                                      |                                                                                                                                                          |                                                   |                                                                                                                                                                                                                                                                                                                                                                                                                                                                                                                                                                                                                                                                                                                                                                                                                                                                                                                                                                                                                                                                                                                                                                                                                                                                                                                                                                                                                                                                                                                                                                                                                                                                                                                                                                                                                                                                                                                                                                                                                                                                                                                                                                                                                                                                                                                                                                                                                                                                                                                                                                                                                                                 |                                                                  |                                                                       |                                                                                                                                                                                                                                                                                                                                                                                                                                                                                                                                                                                                                                                                                                                                                                                                                                                                                                                                                                                                                                                                |                                                                                                                                                                                                                                                                                                                                                                                                                                                                                                                                                                                                                                                                                                                                                                                                                                                                                                                                                                                                                                                                                                                                                                                                                                                                                                                                                                                                                                                                                                                                                                                                                                                                                                                                                                                                                                                                                                                                                                                                                                                                                                                                                                                                                                                                                                                                                                                                                                                                                                                                                                                                                                                 |                        |                                                |                                                                                                                                                                                                                                                                                                                                                                                                                                                                                                                                                                                                                                                                                                                                                                                                                                                                                                                                                                                                                                                                |                                                |                                                 |                                                |                                                 |                                                |                                                 |                                                |                                                 |                                                |                                                 |                                                |                                                 |                                                                                                                                                                                                                                                                                                                                                                                                                                                                                                                                                                                                                                                                                                                                                                                                                                                                                                                                                                                                                                                                                                                                                                                              |                                                 |                                                |                                                 |                                                                                                                                                                                                                                                                                                                                                                                                                                                                                                                                                                                                                                                                                                                                                                                                                                                                                                                                                                                                                                                                                                                                                                                              |                                                 |                                              |                                                 |                                              |                                                 |                                              |                                                 |                                              |                                                 |                                              |                                                 |                                              |                                                 |                                              |                                                 |                                              |                                                 |                                              |                                                                                                                         |  |
| Week 5 <input style="width: 50%;" type="text"/>                                                                                                                                                                                                                                                                                                                                                                                                                                                                                                                                                                                                                                                                                                                                                                                                                                                                                                                                                                                                                                                                                                                                                                                                                                                                                                                                                                                                                                                                                                                                                                                                                                                                                                                                                                                                                                                                                                                                                                                                                                                                                                                                                                                                                                                                                                                                                                                                                                                                                                                                                                                                                                                                                                                                                                                                                                                                                                                                                                                                                                                                                                                                                                                                                                                                                                                                                                                                                                                                                                                                                                                                                                                                                                                                                                                                                                                                                                                                                                                                                                                                                                                                                                                                                                                                                                                                 | <input style="width: 40%;" type="checkbox"/>                                         |                                                                          |                                                                       |                                                                                                                                                                                                                                                                                                                                                                                                                                                                                                                                                                                                                                                                                                                                                                                                                                                                                                                                                                                                                                                      |                                                           |                                                                          |                                                             |                                                      |                                                                          |                                                                      |                                                                                                                                                          |                                                   |                                                                                                                                                                                                                                                                                                                                                                                                                                                                                                                                                                                                                                                                                                                                                                                                                                                                                                                                                                                                                                                                                                                                                                                                                                                                                                                                                                                                                                                                                                                                                                                                                                                                                                                                                                                                                                                                                                                                                                                                                                                                                                                                                                                                                                                                                                                                                                                                                                                                                                                                                                                                                                                 |                                                                  |                                                                       |                                                                                                                                                                                                                                                                                                                                                                                                                                                                                                                                                                                                                                                                                                                                                                                                                                                                                                                                                                                                                                                                |                                                                                                                                                                                                                                                                                                                                                                                                                                                                                                                                                                                                                                                                                                                                                                                                                                                                                                                                                                                                                                                                                                                                                                                                                                                                                                                                                                                                                                                                                                                                                                                                                                                                                                                                                                                                                                                                                                                                                                                                                                                                                                                                                                                                                                                                                                                                                                                                                                                                                                                                                                                                                                                 |                        |                                                |                                                                                                                                                                                                                                                                                                                                                                                                                                                                                                                                                                                                                                                                                                                                                                                                                                                                                                                                                                                                                                                                |                                                |                                                 |                                                |                                                 |                                                |                                                 |                                                |                                                 |                                                |                                                 |                                                |                                                 |                                                                                                                                                                                                                                                                                                                                                                                                                                                                                                                                                                                                                                                                                                                                                                                                                                                                                                                                                                                                                                                                                                                                                                                              |                                                 |                                                |                                                 |                                                                                                                                                                                                                                                                                                                                                                                                                                                                                                                                                                                                                                                                                                                                                                                                                                                                                                                                                                                                                                                                                                                                                                                              |                                                 |                                              |                                                 |                                              |                                                 |                                              |                                                 |                                              |                                                 |                                              |                                                 |                                              |                                                 |                                              |                                                 |                                              |                                                 |                                              |                                                                                                                         |  |
| Week 6 <input style="width: 50%;" type="text"/>                                                                                                                                                                                                                                                                                                                                                                                                                                                                                                                                                                                                                                                                                                                                                                                                                                                                                                                                                                                                                                                                                                                                                                                                                                                                                                                                                                                                                                                                                                                                                                                                                                                                                                                                                                                                                                                                                                                                                                                                                                                                                                                                                                                                                                                                                                                                                                                                                                                                                                                                                                                                                                                                                                                                                                                                                                                                                                                                                                                                                                                                                                                                                                                                                                                                                                                                                                                                                                                                                                                                                                                                                                                                                                                                                                                                                                                                                                                                                                                                                                                                                                                                                                                                                                                                                                                                 | <input style="width: 40%;" type="checkbox"/>                                         |                                                                          |                                                                       |                                                                                                                                                                                                                                                                                                                                                                                                                                                                                                                                                                                                                                                                                                                                                                                                                                                                                                                                                                                                                                                      |                                                           |                                                                          |                                                             |                                                      |                                                                          |                                                                      |                                                                                                                                                          |                                                   |                                                                                                                                                                                                                                                                                                                                                                                                                                                                                                                                                                                                                                                                                                                                                                                                                                                                                                                                                                                                                                                                                                                                                                                                                                                                                                                                                                                                                                                                                                                                                                                                                                                                                                                                                                                                                                                                                                                                                                                                                                                                                                                                                                                                                                                                                                                                                                                                                                                                                                                                                                                                                                                 |                                                                  |                                                                       |                                                                                                                                                                                                                                                                                                                                                                                                                                                                                                                                                                                                                                                                                                                                                                                                                                                                                                                                                                                                                                                                |                                                                                                                                                                                                                                                                                                                                                                                                                                                                                                                                                                                                                                                                                                                                                                                                                                                                                                                                                                                                                                                                                                                                                                                                                                                                                                                                                                                                                                                                                                                                                                                                                                                                                                                                                                                                                                                                                                                                                                                                                                                                                                                                                                                                                                                                                                                                                                                                                                                                                                                                                                                                                                                 |                        |                                                |                                                                                                                                                                                                                                                                                                                                                                                                                                                                                                                                                                                                                                                                                                                                                                                                                                                                                                                                                                                                                                                                |                                                |                                                 |                                                |                                                 |                                                |                                                 |                                                |                                                 |                                                |                                                 |                                                |                                                 |                                                                                                                                                                                                                                                                                                                                                                                                                                                                                                                                                                                                                                                                                                                                                                                                                                                                                                                                                                                                                                                                                                                                                                                              |                                                 |                                                |                                                 |                                                                                                                                                                                                                                                                                                                                                                                                                                                                                                                                                                                                                                                                                                                                                                                                                                                                                                                                                                                                                                                                                                                                                                                              |                                                 |                                              |                                                 |                                              |                                                 |                                              |                                                 |                                              |                                                 |                                              |                                                 |                                              |                                                 |                                              |                                                 |                                              |                                                 |                                              |                                                                                                                         |  |
| Week 7 <input style="width: 50%;" type="text"/>                                                                                                                                                                                                                                                                                                                                                                                                                                                                                                                                                                                                                                                                                                                                                                                                                                                                                                                                                                                                                                                                                                                                                                                                                                                                                                                                                                                                                                                                                                                                                                                                                                                                                                                                                                                                                                                                                                                                                                                                                                                                                                                                                                                                                                                                                                                                                                                                                                                                                                                                                                                                                                                                                                                                                                                                                                                                                                                                                                                                                                                                                                                                                                                                                                                                                                                                                                                                                                                                                                                                                                                                                                                                                                                                                                                                                                                                                                                                                                                                                                                                                                                                                                                                                                                                                                                                 | <input style="width: 40%;" type="checkbox"/>                                         |                                                                          |                                                                       |                                                                                                                                                                                                                                                                                                                                                                                                                                                                                                                                                                                                                                                                                                                                                                                                                                                                                                                                                                                                                                                      |                                                           |                                                                          |                                                             |                                                      |                                                                          |                                                                      |                                                                                                                                                          |                                                   |                                                                                                                                                                                                                                                                                                                                                                                                                                                                                                                                                                                                                                                                                                                                                                                                                                                                                                                                                                                                                                                                                                                                                                                                                                                                                                                                                                                                                                                                                                                                                                                                                                                                                                                                                                                                                                                                                                                                                                                                                                                                                                                                                                                                                                                                                                                                                                                                                                                                                                                                                                                                                                                 |                                                                  |                                                                       |                                                                                                                                                                                                                                                                                                                                                                                                                                                                                                                                                                                                                                                                                                                                                                                                                                                                                                                                                                                                                                                                |                                                                                                                                                                                                                                                                                                                                                                                                                                                                                                                                                                                                                                                                                                                                                                                                                                                                                                                                                                                                                                                                                                                                                                                                                                                                                                                                                                                                                                                                                                                                                                                                                                                                                                                                                                                                                                                                                                                                                                                                                                                                                                                                                                                                                                                                                                                                                                                                                                                                                                                                                                                                                                                 |                        |                                                |                                                                                                                                                                                                                                                                                                                                                                                                                                                                                                                                                                                                                                                                                                                                                                                                                                                                                                                                                                                                                                                                |                                                |                                                 |                                                |                                                 |                                                |                                                 |                                                |                                                 |                                                |                                                 |                                                |                                                 |                                                                                                                                                                                                                                                                                                                                                                                                                                                                                                                                                                                                                                                                                                                                                                                                                                                                                                                                                                                                                                                                                                                                                                                              |                                                 |                                                |                                                 |                                                                                                                                                                                                                                                                                                                                                                                                                                                                                                                                                                                                                                                                                                                                                                                                                                                                                                                                                                                                                                                                                                                                                                                              |                                                 |                                              |                                                 |                                              |                                                 |                                              |                                                 |                                              |                                                 |                                              |                                                 |                                              |                                                 |                                              |                                                 |                                              |                                                 |                                              |                                                                                                                         |  |
| Week 8 <input style="width: 50%;" type="text"/>                                                                                                                                                                                                                                                                                                                                                                                                                                                                                                                                                                                                                                                                                                                                                                                                                                                                                                                                                                                                                                                                                                                                                                                                                                                                                                                                                                                                                                                                                                                                                                                                                                                                                                                                                                                                                                                                                                                                                                                                                                                                                                                                                                                                                                                                                                                                                                                                                                                                                                                                                                                                                                                                                                                                                                                                                                                                                                                                                                                                                                                                                                                                                                                                                                                                                                                                                                                                                                                                                                                                                                                                                                                                                                                                                                                                                                                                                                                                                                                                                                                                                                                                                                                                                                                                                                                                 | <input style="width: 40%;" type="checkbox"/>                                         |                                                                          |                                                                       |                                                                                                                                                                                                                                                                                                                                                                                                                                                                                                                                                                                                                                                                                                                                                                                                                                                                                                                                                                                                                                                      |                                                           |                                                                          |                                                             |                                                      |                                                                          |                                                                      |                                                                                                                                                          |                                                   |                                                                                                                                                                                                                                                                                                                                                                                                                                                                                                                                                                                                                                                                                                                                                                                                                                                                                                                                                                                                                                                                                                                                                                                                                                                                                                                                                                                                                                                                                                                                                                                                                                                                                                                                                                                                                                                                                                                                                                                                                                                                                                                                                                                                                                                                                                                                                                                                                                                                                                                                                                                                                                                 |                                                                  |                                                                       |                                                                                                                                                                                                                                                                                                                                                                                                                                                                                                                                                                                                                                                                                                                                                                                                                                                                                                                                                                                                                                                                |                                                                                                                                                                                                                                                                                                                                                                                                                                                                                                                                                                                                                                                                                                                                                                                                                                                                                                                                                                                                                                                                                                                                                                                                                                                                                                                                                                                                                                                                                                                                                                                                                                                                                                                                                                                                                                                                                                                                                                                                                                                                                                                                                                                                                                                                                                                                                                                                                                                                                                                                                                                                                                                 |                        |                                                |                                                                                                                                                                                                                                                                                                                                                                                                                                                                                                                                                                                                                                                                                                                                                                                                                                                                                                                                                                                                                                                                |                                                |                                                 |                                                |                                                 |                                                |                                                 |                                                |                                                 |                                                |                                                 |                                                |                                                 |                                                                                                                                                                                                                                                                                                                                                                                                                                                                                                                                                                                                                                                                                                                                                                                                                                                                                                                                                                                                                                                                                                                                                                                              |                                                 |                                                |                                                 |                                                                                                                                                                                                                                                                                                                                                                                                                                                                                                                                                                                                                                                                                                                                                                                                                                                                                                                                                                                                                                                                                                                                                                                              |                                                 |                                              |                                                 |                                              |                                                 |                                              |                                                 |                                              |                                                 |                                              |                                                 |                                              |                                                 |                                              |                                                 |                                              |                                                 |                                              |                                                                                                                         |  |
| <b>Please take the medications with food to reduce stomach irritation. Please take this card with you all the time!</b>                                                                                                                                                                                                                                                                                                                                                                                                                                                                                                                                                                                                                                                                                                                                                                                                                                                                                                                                                                                                                                                                                                                                                                                                                                                                                                                                                                                                                                                                                                                                                                                                                                                                                                                                                                                                                                                                                                                                                                                                                                                                                                                                                                                                                                                                                                                                                                                                                                                                                                                                                                                                                                                                                                                                                                                                                                                                                                                                                                                                                                                                                                                                                                                                                                                                                                                                                                                                                                                                                                                                                                                                                                                                                                                                                                                                                                                                                                                                                                                                                                                                                                                                                                                                                                                         |                                                                                      |                                                                          |                                                                       |                                                                                                                                                                                                                                                                                                                                                                                                                                                                                                                                                                                                                                                                                                                                                                                                                                                                                                                                                                                                                                                      |                                                           |                                                                          |                                                             |                                                      |                                                                          |                                                                      |                                                                                                                                                          |                                                   |                                                                                                                                                                                                                                                                                                                                                                                                                                                                                                                                                                                                                                                                                                                                                                                                                                                                                                                                                                                                                                                                                                                                                                                                                                                                                                                                                                                                                                                                                                                                                                                                                                                                                                                                                                                                                                                                                                                                                                                                                                                                                                                                                                                                                                                                                                                                                                                                                                                                                                                                                                                                                                                 |                                                                  |                                                                       |                                                                                                                                                                                                                                                                                                                                                                                                                                                                                                                                                                                                                                                                                                                                                                                                                                                                                                                                                                                                                                                                |                                                                                                                                                                                                                                                                                                                                                                                                                                                                                                                                                                                                                                                                                                                                                                                                                                                                                                                                                                                                                                                                                                                                                                                                                                                                                                                                                                                                                                                                                                                                                                                                                                                                                                                                                                                                                                                                                                                                                                                                                                                                                                                                                                                                                                                                                                                                                                                                                                                                                                                                                                                                                                                 |                        |                                                |                                                                                                                                                                                                                                                                                                                                                                                                                                                                                                                                                                                                                                                                                                                                                                                                                                                                                                                                                                                                                                                                |                                                |                                                 |                                                |                                                 |                                                |                                                 |                                                |                                                 |                                                |                                                 |                                                |                                                 |                                                                                                                                                                                                                                                                                                                                                                                                                                                                                                                                                                                                                                                                                                                                                                                                                                                                                                                                                                                                                                                                                                                                                                                              |                                                 |                                                |                                                 |                                                                                                                                                                                                                                                                                                                                                                                                                                                                                                                                                                                                                                                                                                                                                                                                                                                                                                                                                                                                                                                                                                                                                                                              |                                                 |                                              |                                                 |                                              |                                                 |                                              |                                                 |                                              |                                                 |                                              |                                                 |                                              |                                                 |                                              |                                                 |                                              |                                                 |                                              |                                                                                                                         |  |

**Appendix 4:** Example discussion guide for interviews and focus group discussions with village malaria workers. VMW follow-up was one of three topics covered during these sessions.

| Question                                                                                                                                                                                                            | Description                                                                                                                                                                                                                                   |
|---------------------------------------------------------------------------------------------------------------------------------------------------------------------------------------------------------------------|-----------------------------------------------------------------------------------------------------------------------------------------------------------------------------------------------------------------------------------------------|
| 1. Can you describe the process of what you do to diagnose and treat vivax malaria patients?                                                                                                                        | <b>Process of diagnosing vivax and treating it.</b><br><br>A detailed description of what VMWs do to diagnosis and treat vivax malaria.                                                                                                       |
| 2. Can you tell me more about what happens after the patient receives treatment?<br><br>a. If they do not describe in person follow-up: Why have you been or not been conducting follow-up?                         | <b>Completion of follow-up.</b> Whether or not VMWs are conducting follow-up and if not why.                                                                                                                                                  |
| 3. Do you know why you have to follow-up patients who have vivax malaria?                                                                                                                                           | <b>Reason for conducting VMW follow-up.</b><br>→ what is the need for VMW follow-up, should be to ensure adherence and safety, and hopefully prevent relapse as a result.                                                                     |
| 4. What has vivax patient follow-up been like?<br><br>a. How have patients responded?                                                                                                                               | <b>VMW follow-up experience.</b> Good, bad, annoyed, easy, challenging, fruitful, reaction of patients having the VMW come on check on them. Do they mind it, are they annoyed, happy. Start but cannot finish follow-up.                     |
| 5. Describe what is done once you leave to make the follow-up visits until the visit is finished.<br><br>a. Do you need to do anything before you leave to go to the patient's house or after you finish the visit? | <b>VMW follow-up process.</b> Describe the different activities that have to be done when conducting VMW follow-up. From leaving the house to the end of the visit. Things they need to do before they leave and after they finish the visit. |

|                                                                                                                                                                                                        |                                                                                                                                                                                                                                                                 |
|--------------------------------------------------------------------------------------------------------------------------------------------------------------------------------------------------------|-----------------------------------------------------------------------------------------------------------------------------------------------------------------------------------------------------------------------------------------------------------------|
|                                                                                                                                                                                                        |                                                                                                                                                                                                                                                                 |
| <p>6. Do you go through this process for all your patients?</p> <p>a. If not, why not?</p> <p>b. If they do not mention follow on day 3, 7, 14: Why do you not follow-up patients on day 3, 7, 14?</p> | <p><b>Consistent completion of VMW follow-up.</b> Do they follow-up all vivax patients in their village. And if they do not, why.</p>                                                                                                                           |
| <p>7. How would you describe the role of the patient in the follow-up process?</p>                                                                                                                     | <p><b>Role of the patient in VMW follow-up.</b> What does the patient need to do a part of the supervision and monitoring process. <i>E.g.</i> monitor their urine color, or pay attention to any other side effects; fill in their patient follow-up form.</p> |
| <p>8. Are there any obstacles faced when conducting follow-up?</p> <p>a. If yes, what is difficult about the process and what could make it easier?</p>                                                | <p><b>Barriers to VMW follow up.</b> Things that make it difficult to do or stop it from being done. What they are and if there is any way to solve the problems described.</p>                                                                                 |
| <p>9. Do you think the follow-up has helped or will help vivax malaria treatment and treatment outcomes?</p> <p>a. In what ways might it have or have not helped?</p>                                  | <p><b>Effectiveness of VMW follow-up.</b> Has VMWs visiting patients made a difference in whether the patients take their medication and whether they relapse. Reasons behind their answers.</p>                                                                |
| <p>10. Do you have any questions/ concerns or things that you would like us to know?</p>                                                                                                               | <p>Anything else the respondent might want to say that they have not done so yet.</p>                                                                                                                                                                           |
| <p>11. People we should be discussing with/learn from?</p>                                                                                                                                             | <p>Any other person the respondent thinks we should talk to.</p>                                                                                                                                                                                                |

## Appendix 5: COREQ checklist for qualitative research

### COREQ (Consolidated criteria for REporting Qualitative research) Checklist

A checklist of items that should be included in reports of qualitative research. You must report the page number in your manuscript where you consider each of the items listed in this checklist. If you have not included this information, either revise your manuscript accordingly before submitting or note N/A.

| Topic                                          | Item No. | Guide Questions/Description                                                                                                                              | Reported on Page No. |
|------------------------------------------------|----------|----------------------------------------------------------------------------------------------------------------------------------------------------------|----------------------|
| <b>Domain 1: Research team and reflexivity</b> |          |                                                                                                                                                          |                      |
| <i>Personal characteristics</i>                |          |                                                                                                                                                          |                      |
| Interviewer/facilitator                        | 1        | Which author/s conducted the interview or focus group?                                                                                                   | 13                   |
| Credentials                                    | 2        | What were the researcher's credentials? E.g. PhD, MD                                                                                                     | N/A                  |
| Occupation                                     | 3        | What was their occupation at the time of the study?                                                                                                      | N/A                  |
| Gender                                         | 4        | Was the researcher male or female?                                                                                                                       | N/A                  |
| Experience and training                        | 5        | What experience or training did the researcher have?                                                                                                     | N/A                  |
| <i>Relationship with participants</i>          |          |                                                                                                                                                          |                      |
| Relationship established                       | 6        | Was a relationship established prior to study commencement?                                                                                              | N/A                  |
| Participant knowledge of the interviewer       | 7        | What did the participants know about the researcher? e.g. personal goals, reasons for doing the research                                                 | N/A                  |
| Interviewer characteristics                    | 8        | What characteristics were reported about the interviewer/facilitator? e.g. Bias, assumptions, reasons and interests in the research topic                | N/A                  |
| <b>Domain 2: Study design</b>                  |          |                                                                                                                                                          |                      |
| <i>Theoretical framework</i>                   |          |                                                                                                                                                          |                      |
| Methodological orientation and Theory          | 9        | What methodological orientation was stated to underpin the study? e.g. grounded theory, discourse analysis, ethnography, phenomenology, content analysis | 6,7,8                |
| <i>Participant selection</i>                   |          |                                                                                                                                                          |                      |
| Sampling                                       | 10       | How were participants selected? e.g. purposive, convenience, consecutive, snowball                                                                       | 12,13                |
| Method of approach                             | 11       | How were participants approached? e.g. face-to-face, telephone, mail, email                                                                              | 12,13                |
| Sample size                                    | 12       | How many participants were in the study?                                                                                                                 | 16                   |
| Non-participation                              | 13       | How many people refused to participate or dropped out? Reasons?                                                                                          | N/A                  |
| <i>Setting</i>                                 |          |                                                                                                                                                          |                      |
| Setting of data collection                     | 14       | Where was the data collected? e.g. home, clinic, workplace                                                                                               | 12,13                |
| Presence of non-participants                   | 15       | Was anyone else present besides the participants and researchers?                                                                                        | 12,13                |
| Description of sample                          | 16       | What are the important characteristics of the sample? e.g. demographic data, date                                                                        | Apdx 6               |
| <i>Data collection</i>                         |          |                                                                                                                                                          |                      |
| Interview guide                                | 17       | Were questions, prompts, guides provided by the authors? Was it pilot tested?                                                                            | 13, Apdx 4           |
| Repeat interviews                              | 18       | Were repeat interviews carried out? If yes, how many?                                                                                                    | Apdx 6               |
| Audio/visual recording                         | 19       | Did the research use audio or visual recording to collect the data?                                                                                      | 12,13                |
| Field notes                                    | 20       | Were field notes made during and/or after the interview or focus group?                                                                                  | 12,14                |
| Duration                                       | 21       | What was the duration of the interviews or focus group?                                                                                                  | N/A                  |
| Data saturation                                | 22       | Was data saturation discussed?                                                                                                                           | N/A                  |
| Transcripts returned                           | 23       | Were transcripts returned to participants for comment and/or                                                                                             | N/A                  |

| Topic                                  | Item No. | Guide Questions/Description                                                                                                        | Reported on Page No. |
|----------------------------------------|----------|------------------------------------------------------------------------------------------------------------------------------------|----------------------|
|                                        |          | correction?                                                                                                                        |                      |
| <b>Domain 3: analysis and findings</b> |          |                                                                                                                                    |                      |
| <i>Data analysis</i>                   |          |                                                                                                                                    |                      |
| Number of data coders                  | 24       | How many data coders coded the data?                                                                                               | 14                   |
| Description of the coding tree         | 25       | Did authors provide a description of the coding tree?                                                                              | N/A                  |
| Derivation of themes                   | 26       | Were themes identified in advance or derived from the data?                                                                        | 14                   |
| Software                               | 27       | What software, if applicable, was used to manage the data?                                                                         | 14                   |
| Participant checking                   | 28       | Did participants provide feedback on the findings?                                                                                 | N/A                  |
| <i>Reporting</i>                       |          |                                                                                                                                    |                      |
| Quotations presented                   | 29       | Were participant quotations presented to illustrate the themes/findings?<br>Was each quotation identified? e.g. participant number | 15-29                |
| Data and findings consistent           | 30       | Was there consistency between the data presented and the findings?                                                                 | 15-30                |
| Clarity of major themes                | 31       | Were major themes clearly presented in the findings?                                                                               | 15-29                |
| Clarity of minor themes                | 32       | Is there a description of diverse cases or discussion of minor themes?                                                             | 15-29                |

Developed from: Tong A, Sainsbury P, Craig J. Consolidated criteria for reporting qualitative research (COREQ): a 32-item checklist for interviews and focus groups. *International Journal for Quality in Health Care*. 2007. Volume 19, Number 6: pp. 349 – 357



**Appendix 6: Demographic characteristics of interviews and focus group discussion participants**

| <b>Participant Number</b> | <b>Discussion Type</b> | <b>Discussion Number</b> | <b>Respondent Number (FGD)</b> | <b>Manuscript Code</b> | <b>Age</b> | <b>Gender</b> | <b>Occupation</b>        | <b>Follow-up</b> |
|---------------------------|------------------------|--------------------------|--------------------------------|------------------------|------------|---------------|--------------------------|------------------|
| 1                         | Interview              | 1                        | Interview                      | pp1                    | 57         | Male          | EFFORT Patient - Teacher | No               |
| 2                         | Interview              | 2                        | Interview                      | pp2                    | 27         | Male          | EFFORT Patient - Farmer  | No               |
| 3                         | Focus Group Discussion | 1                        | R1                             | chw1                   | 51         | Male          | VMW (Farmer)             | No               |
| 4                         | Focus Group Discussion | 1                        | R2                             | chw2                   | 39         | Female        | VMW (Groceries seller)   | No               |
| 5                         | Focus Group Discussion | 1                        | R3                             | chw3                   | 50         | Female        | VMW (Farmer)             | No               |
| 6                         | Focus Group Discussion | 1                        | R4                             | chw4                   | 24         | Male          | VMW (Farmer)             | No               |
| 7                         | Focus Group Discussion | 1                        | R5                             | chw5                   | 41         | Female        | VMW (Farmer)             | No               |
| 8                         | Focus Group Discussion | 1                        | R6                             | chw6                   | 49         | Female        | VMW (Farmer)             | No               |
| 9                         | Focus Group Discussion | 1                        | R7                             | chw7                   | 56         | Female        | VMW (Farmer)             | No               |
| 10                        | Focus Group Discussion | 2                        | R1                             | rh1                    | 29         | Female        | Referral Hospital Nurse  | Yes              |
| 11                        | Focus Group Discussion | 2                        | R2                             | rh2                    | 27         | Female        | Referral Hospital Nurse  | Yes              |
| 12                        | Focus Group Discussion | 2                        | R3                             | rh3                    | 29         | Male          | Referral Hospital Nurse  | Yes              |
| 13                        | Focus Group Discussion | 2                        | R4                             | rh4                    | 26         | Female        | Referral Hospital Nurse  | No               |
| 14                        | Focus Group Discussion | 2                        | R5                             | rh5                    | 30         | Male          | Referral Hospital Nurse  | No               |
| 15                        | Interview              | 3                        | Interview                      | pp3                    | 30         | Female        | Farmer (former VMW)      | No               |
| 16                        | Interview              | 4                        | Interview                      | pp4                    | 22         | Male          | Farmer                   | No               |
| 17                        | Focus Group Discussion | 3                        | R1                             | chw8                   | 35         | Female        | VMW (Housewife)          | Yes              |
| 18                        | Focus Group Discussion | 3                        | R2                             | chw9                   | 63         | Male          | VMW (Farmer)             | No               |
| 19                        | Focus Group Discussion | 3                        | R3                             | chw10                  | 33         | Male          | VMW (Farmer)             | No               |

|    |                        |     |           |       |    |        |                                            |     |
|----|------------------------|-----|-----------|-------|----|--------|--------------------------------------------|-----|
| 20 | Focus Group Discussion | 3   | R4        | chw11 | 61 | Male   | VMW (Farmer)                               | Yes |
| 21 | Focus Group Discussion | 3   | R5        | chw12 | 41 | Female | VMW (Groceries seller)                     | Yes |
| 22 | Focus Group Discussion | 3   | R6        | chw13 | 62 | Female | VMW (Groceries seller)                     | Yes |
| 23 | Interview              | 5   | Interview | hc1   | 45 | Male   | Health Centre Nurse                        | Yes |
| 24 | Interview              | 6   | Interview | do1   | 50 | Male   | Operational District Malaria Supervisor    | No  |
| 25 | Interview              | 7   | Interview | et1   | 27 | Female | EFFORT Lab Staff                           | Yes |
| 26 | Interview              | 8   | Interview | et1   | 34 | Male   | EFFORT Assistant                           | No  |
| 27 | Interview              | 9   | Interview | etd1  | 34 | Female | Referral Hospital Doctor and EFFORT Doctor | Yes |
| 28 | Interview              | 10  | Interview | pp5   | 47 | Male   | EFFORT Patient - Environment officer       | No  |
| 29 | Interview              | 11  | Interview | pp6   | 18 | Male   | EFFORT Patient - Farmer                    | No  |
| 30 | Focus Group Discussion | 4   | R1        | et2   | 34 | Male   | EFFORT staff                               | No  |
| 31 | Focus Group Discussion | 4   | R2        | et3   | 31 | Male   | Referral Hospital Nurse and EFFORT Nurse   | No  |
| 32 | Focus Group Discussion | 4   | R3        | et4   | 28 | Female | Referral Hospital Nurse and EFFORT Nurse   | No  |
| 33 | Focus Group Discussion | 4   | R4        | et5   | 24 | Female | Referral Hospital Nurse and EFFORT Nurse   | No  |
| 34 | Focus Group Discussion | 4   | R5        | et12  | 29 | Female | EFFORT Lab Staff                           | No  |
| 35 | Focus Group Discussion | 4   | R6        | et13  | 27 | Male   | EFFORT Lab Staff                           | Yes |
| 36 | Interview              | 12  | Interview | pp7   | 31 | Male   | EFFORT Patient - Construction worker       | No  |
| 37 | Interview              | 13  | Interview | pp8   | 50 | Male   | EFFORT Patient - Farmer                    | No  |
| 38 | Interview              | 14  | Interview | pp9   | 18 | Male   | EFFORT Patient - Labor worker              | No  |
| 39 | Interview              | 15  | Interview | cnm1  |    | Male   | National Malaria Program/CNM Official      | No  |
| 40 | Interview              | 15a | R1        | pp10  | 37 | Male   | EFFORT Patient - Farmer                    | No  |
| 41 | Interview              | 15a | R2        | pp11  | 18 | Male   | EFFORT Patient - Farmer                    | No  |
| 42 | Interview              | 16  | Interview | pp12  | 18 | Male   | EFFORT Patient - Farmer                    | No  |

|    |                        |     |           |       |    |        |                                            |     |
|----|------------------------|-----|-----------|-------|----|--------|--------------------------------------------|-----|
| 43 | Interview              | 17  | Interview | etd2  | 30 | Female | Referral Hospital Doctor and EFFORT Doctor | Yes |
| 44 | Interview              | 18  | Interview | pp13  | 25 | Female | EFFORT Patient - Farmer                    | No  |
| 45 | Interview              | 19  | Interview | chw14 | 25 | Female | VMW (Online Seller)                        | No  |
| 46 | Interview              | 20  | Interview | pp14  | 18 | Male   | EFFORT Patient - Farmer                    | No  |
| 47 | Interview              | 21  | Interview | pp15  | 34 | Male   | EFFORT Patient - Farmer                    | No  |
| 48 | Interview              | 22  | Interview | pp16  | 36 | Male   | EFFORT Patient - Labor Worker              | No  |
| 49 | Interview              | 23  | Interview | pp17  | 18 | Male   | EFFORT Patient - Farmer                    | No  |
| 50 | Interview              | 24  | Interview | pp18  | 47 | Female | EFFORT Patient - Farmer                    | No  |
| 51 | Interview              | 25  | Interview | po1   | 50 | Male   | Provincial Health Department Official      | No  |
| 52 | Interview              | 26  | Interview | pp19  | 39 | Female | EFFORT Patient - Farmer                    | No  |
| 53 | Interview              | 27  | Interview | cnmp1 | 50 | Male   | CNM Partner (URC staff)                    | No  |
| 54 | Interview              | 28  | Interview | etd3  | 36 | Male   | Referral Hospital Doctor and EFFORT Doctor | Yes |
| 55 | Interview              | 29  | Interview | po2   | 50 | Female | Provincial Malaria Supervisor              | No  |
| 56 | Interview              | 30C | Interview | hc2   | 55 | Male   | Health Centre Clerk                        | No  |
| 57 | Interview              | 31C | Interview | hc3   |    | Female | Health Centre Nurse                        | Yes |
| 58 | Focus Group Discussion | 5C  | R1        | chw15 | 51 | Female | VMW (Farmer)                               | No  |
| 59 | Focus Group Discussion | 5C  | R2        | chw16 | 54 | Female | VMW (Farmer)                               | No  |
| 60 | Focus Group Discussion | 5C  | R3        | chw17 | 65 | Male   | VMW (Farmer)                               | No  |
| 61 | Focus Group Discussion | 5C  | R4        | chw18 | 63 | Male   | VMW (Farmer)                               | No  |
| 62 | Focus Group Discussion | 5C  | R5        | chw19 | 43 | Male   | VMW (Farmer)                               | No  |
| 63 | Focus Group Discussion | 5C  | R6        | chw20 | 66 | Male   | VMW (Farmer)                               | No  |
| 64 | Focus Group Discussion | 5C  | R7        | chw21 | 52 | Male   | VMW (Farmer)                               | No  |
| 65 | Focus Group Discussion | 6C  | R1        | chw22 | 52 | Male   | VMW (Farmer)                               | No  |
| 66 | Focus Group Discussion | 6C  | R2        | chw23 | 58 | Male   | VMW (Farmer)                               | No  |
| 67 | Focus Group Discussion | 6C  | R3        | chw24 | 58 | Male   | VMW (Farmer)                               | No  |

|    |                        |     |           |       |    |        |                                                         |     |
|----|------------------------|-----|-----------|-------|----|--------|---------------------------------------------------------|-----|
| 68 | Focus Group Discussion | 6C  | R4        | chw25 | 55 | Male   | VMW (Farmer)                                            | No  |
| 69 | Focus Group Discussion | 6C  | R5        | chw26 | 45 | Female | VMW (Farmer)                                            | No  |
| 70 | Interview              | 32C | Interview | hc4   | 26 | Female | Midwife                                                 | No  |
| 71 | Interview              | 33C | Interview | pp20  | 54 | Male   | Routine patient - School Director                       | No  |
| 72 | Interview              | 34C | Interview | pp21  | 18 | Male   | Routine patient - Find Forest Products                  | No  |
| 73 | Interview              | 35C | Interview | hc5   | 33 | Male   | Health Center Director's Assistant - Malaria Controller | No  |
| 74 | Interview              | 36C | Interview | pp22  | 33 | Male   | Routine patient - Wild Aid staff                        | No  |
| 75 | Interview              | 37C | Interview | po3   | 50 | Male   | Provincial Health Department Official                   | No  |
| 76 | Interview              | 38C | Interview | pp23  | 29 | Female | Routine patient - Corn vender (Farmer)                  | No  |
| 77 | Interview              | 39C | Interview | pp24  | 24 | Female | Routine patient - Find forest products                  | No  |
| 78 | Interview              | 40C | Interview | chw27 | 54 | Male   | VMW (Farmer)                                            | No  |
| 79 | Interview              | 41C | Interview | po4   | 28 | Female | Provincial Malaria Supervisor                           | Yes |
| 80 | Interview              | 42C | Interview | cnmp2 | 34 | Male   | Operational District Partner                            | No  |
| 81 | Focus Group Discussion | 7C  | R1        | do2   | 33 | Male   | Operational District Official                           | No  |
| 82 | Focus Group Discussion | 7C  | R2        | rh6   | 50 | Female | Referral Hospital Assistant                             | No  |
| 83 | Focus Group Discussion | 7C  | R3        | do3   | 29 | Male   | Operational District Malaria Supervisor                 | No  |
| 84 | Focus Group Discussion | 7C  | R4        | rh7   | 57 | Male   | Referral Hospital Director                              | No  |
| 85 | Focus Group Discussion | 7C  | R5        | rhd1  | 55 | Male   | Referral Hospital Doctor                                | No  |
| 86 | Focus Group Discussion | 7C  | R6        | rhl1  | 30 | Male   | Referral Hospital Lab Staff                             | No  |
| 87 | Interview              | 43K | Interview | do4   | 70 | Male   | Operational District Official                           | No  |
| 88 | Interview              | 44K | Interview | do5   | 31 | Male   | Operational District Malaria Supervisor                 | No  |
| 89 | Focus Group Discussion | 8   | R1        | rhl2  | 54 | Male   | Referral Hospital Lab Staff                             | No  |
| 90 | Focus Group Discussion | 8   | R2        | rh8   | 32 | Male   | Referral Hospital Nurse                                 | No  |
| 91 | Focus Group Discussion | 8   | R3        | rh9   | 34 | Female | Referral Hospital Nurse                                 | No  |

|     |                        |     |           |       |    |        |                                               |     |
|-----|------------------------|-----|-----------|-------|----|--------|-----------------------------------------------|-----|
| 92  | Interview              | 45K | Interview | hc6   | 54 | Female | Lab Staff + Private Clinic Owner              | Yes |
| 93  | Interview              | 46K | Interview | hc7   | 53 | Male   | Consultations Doctor + Private Clinic Owner   | Yes |
| 94  | Interview              | 47K | Interview | hc8   | 36 | Female | Midwife + Private Clinic Owner                | Yes |
| 95  | Interview              | 48K | Interview | ps1   | 20 | Female | Routine patient spouse- Farmer                | No  |
| 96  | Interview              | 48K | Interview | pp25  | 25 | Male   | Routine patient - Find Forest Products        | No  |
| 97  | Interview              | 49K | Interview | pp26  | 27 | Male   | Routine patient - Find Forest Products        | No  |
| 98  | Interview              | 49k | Interview | ps2   | 36 | Female | Routine patient spouse - Groceries Seller     | No  |
| 99  | Focus Group Discussion | 9   | R1        | chw28 | 64 | Male   | VMW (Farmer)                                  | No  |
| 100 | Focus Group Discussion | 9   | R2        | chw29 | 37 | Female | VMW (Farmer)                                  | No  |
| 101 | Focus Group Discussion | 9   | R3        | chw30 | 61 | Male   | VMW (Farmer)                                  | No  |
| 102 | Focus Group Discussion | 9   | R4        | chw31 | 43 | Male   | VMW (Farmer)                                  | No  |
| 103 | Focus Group Discussion | 9   | R5        | chw32 | 44 | Male   | VMW (Farmer)                                  | No  |
| 104 | Focus Group Discussion | 9   | R6        | chw33 | 57 | Male   | VMW (Farmer)                                  | No  |
| 105 | Focus Group Discussion | 9   | R7        | chw34 | 28 | Female | VMW (Farmer)                                  | No  |
| 106 | Interview              | 50K | Interview | pp27  | 36 | Male   | Routine patient - Find Forest Products        | No  |
| 107 | Interview              | 50K | Interview | ps3   | 39 | Female | Routine patient spouse -Farmer                | No  |
| 108 | Focus Group Discussion | 10  | R1        | chw35 | 42 | Female | MMW (Farmer)                                  | No  |
| 109 | Focus Group Discussion | 10  | R2        | chw36 | 55 | Female | MMW (Farmer)                                  | No  |
| 110 | Focus Group Discussion | 10  | R3        | chw37 | 29 | Female | MMW (Groceries Seller)                        | No  |
| 111 | Focus Group Discussion | 10  | R4        | chw38 | 30 | Female | MMW (Farmer)                                  | No  |
| 112 | Interview              | 51K | Interview | pp28  | 30 | Male   | Routine patient -Find Forest Product (Farmer) | No  |
| 113 | Interview              | 51K | Interview | ps4   | 27 | Female | Routine patient spouse - Groceries Seller     | No  |
| 114 | Interview              | 52K | Interview | pp29  | 19 | Male   | Routine patient - Find Forest Products        | No  |

|     |                        |           |           |       |    |        |                                            |     |
|-----|------------------------|-----------|-----------|-------|----|--------|--------------------------------------------|-----|
| 115 | Interview              | 53K       | Interview | hc9   | 55 | Male   | Health Centre Nurse - Malaria Controller   | Yes |
| 116 | Interview              | 54k       | Interview | pp30  | 45 | Male   | Routine patient - Forestry Administrations | No  |
| 117 | Interview              | 55K       | Interview | pp31  | 68 | Male   | Routine patient - Forestry Administrations | No  |
| 118 | Interview              | 56SP      | Interview | etd4  | 57 | Male   | EFFORT Doctor                              | No  |
| 119 | Focus Group Discussion | 11SP      | R1        | et6   | 51 | Female | Coordinator (Nurse)                        | No  |
| 120 | Focus Group Discussion | 11SP      | R2        | et7   | 31 | Female | EFFORT Nurse                               | No  |
| 121 | Focus Group Discussion | 11SP      | R3        | etl4  | 30 | Male   | EFFORT Lab Staff                           | No  |
| 122 | Interview              | 57        | Interview | cnm2  |    | Male   | National Malaria Program/CNM Official      | Yes |
| 123 | Interview              | 58        | Interview | cnm3  |    | Male   | National Malaria Program/CNM Official      | Yes |
| 124 | Interview              | 59        | Interview | cnmp3 |    | Male   | CHAI Central Level Official                | Yes |
| 125 | Focus Group Discussion | D3E1 - 13 | R1        | chw39 | 71 | Male   | VMW (Farmer)                               | No  |
| 126 | Focus Group Discussion | D3E1 - 13 | R2        | chw40 | 31 | Female | VMW (Farmer)                               | No  |
| 127 | Focus Group Discussion | D3E1 - 13 | R3        | chw41 | 40 | Female | VMW (Farmer)                               | No  |
| 128 | Focus Group Discussion | D3E1 - 13 | R4        | chw42 | 41 | Female | VMW (Farmer)                               | No  |
| 129 | Focus Group Discussion | D3E1 - 13 | R5        | chw43 | 26 | Female | VMW (Farmer)                               | No  |
| 130 | Focus Group Discussion | D3E1 - 13 | R6        | chw44 | 61 | Female | VMW (Farmer)                               | No  |
| 131 | Focus Group Discussion | D3E1 - 13 | R7        | chw45 | 56 | Female | VMW (Farmer)                               | No  |
| 132 | Focus Group Discussion | D3E1 - 13 | R8        | chw46 | 44 | Female | VMW (Farmer)                               | No  |
| 133 | Interview              | D3E2 - 60 | Interview | pp32  | 45 | Male   | Routine patient - Farmer                   | No  |
| 134 | Focus Group Discussion | D3E3 - 14 | R1        | hc10  | 45 | Male   | Health Centre Lab Staff                    | No  |
| 135 | Focus Group Discussion | D3E3 - 14 | R3        | hc11  | 50 | Male   | Health Centre Nurse - Malaria Controller   | No  |

|     |                        |           |    |       |    |        |                         |    |
|-----|------------------------|-----------|----|-------|----|--------|-------------------------|----|
| 136 | Focus Group Discussion | D3E5 - 16 | R2 | chw47 | 34 | Female | VMW (Farmer)            | No |
| 137 | Focus Group Discussion | D3E5 - 16 | R3 | chw48 | 56 | Female | VMW (VHSG)              | No |
| 138 | Focus Group Discussion | D3E5 - 16 | R7 | chw49 | 23 | Female | VMW (Farmer)            | No |
| 139 | Focus Group Discussion | D3E6- 17  | R1 | hc12  | 29 | Male   | Health Centre Lab Staff | No |
| 140 | Focus Group Discussion | D3E7 - 18 | R1 | pp33  | 32 | Male   | Farmer                  | No |
| 141 | Focus Group Discussion | D3E7 - 18 | R2 | pp34  | 27 | Male   | Farmer                  | No |
| 142 | Focus Group Discussion | D3E7 - 18 | R3 | pp35  | 20 | Male   | Farmer                  | No |

## References

- 1 National Center for Parasitology, Entomology and Malaria Control (CNM). National Treatment Guidelines for Malaria in Cambodia. 2022; published online June.
